# Supplementary material for: Identification of five novel genetic loci related to facial morphology by genome-wide association studies
Source: PubMed Central journal article supplement (PMC6008943; doi:10.1186/s12864-018-4865-9), 2018-06-19

**Figure S2: Q-Q plots for the discovery GWAS (85 facial traits)**

**[Face shape – width]**

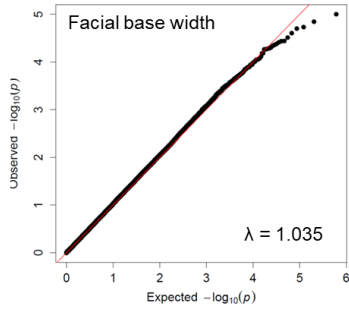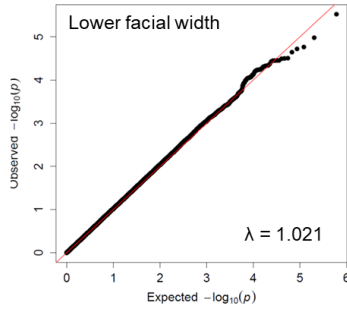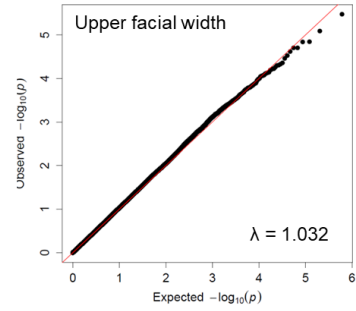

**[Face shape – height]**

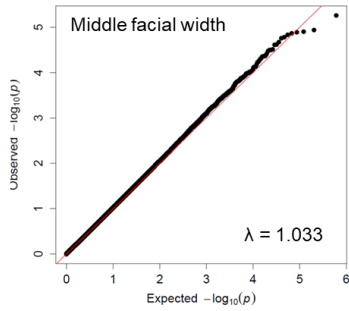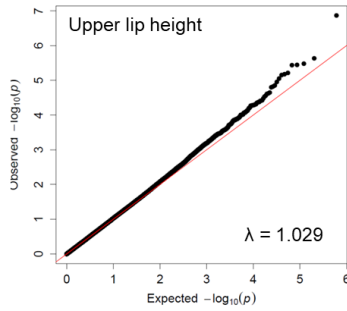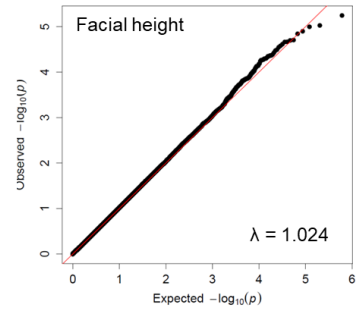

**[Face shape – area]**

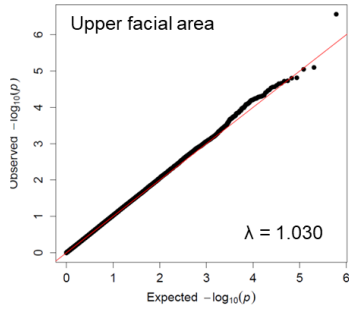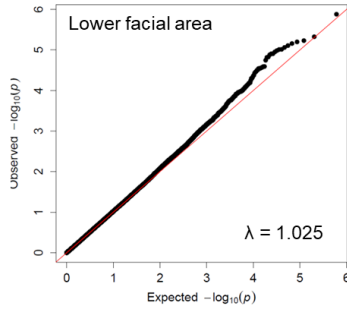

**[Face shape – ratio]**

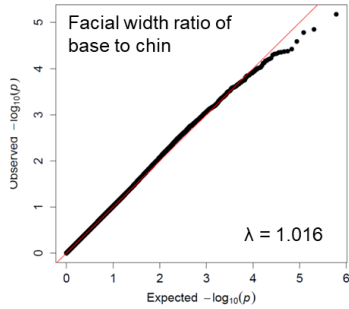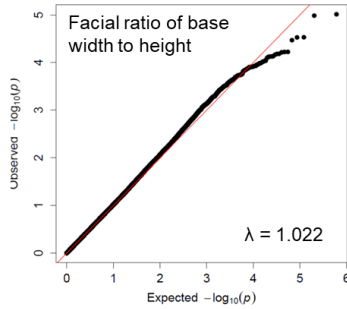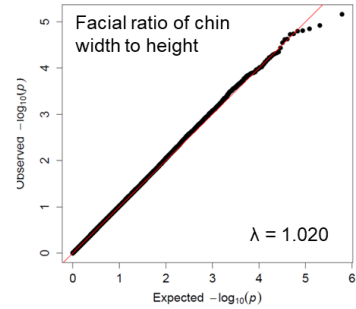

**[Face shape – angle]**

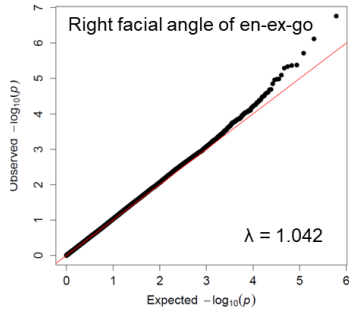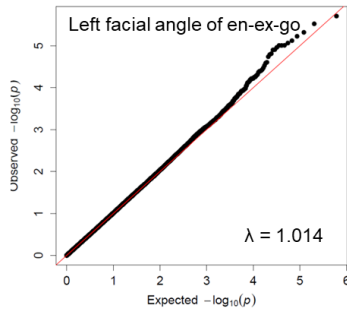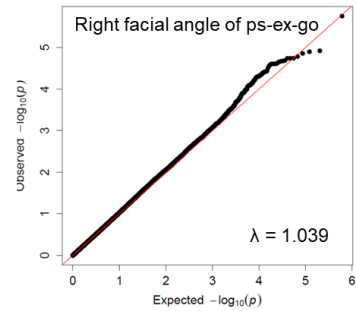

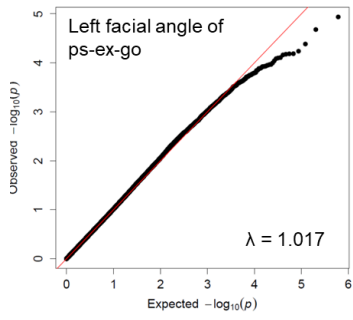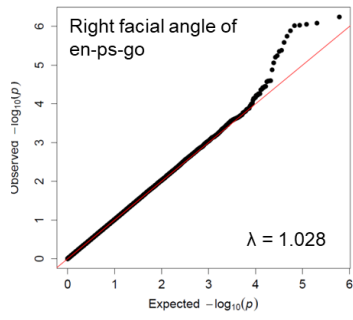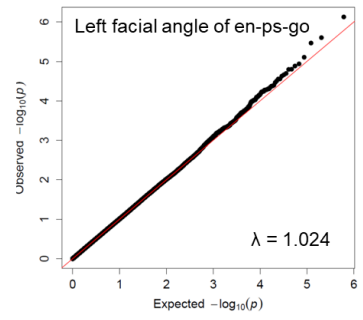

**[Forehead – height]**

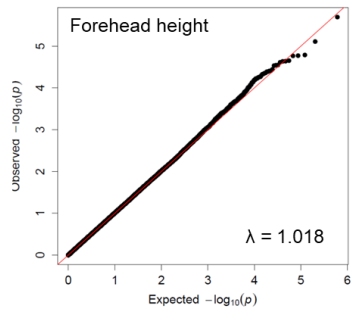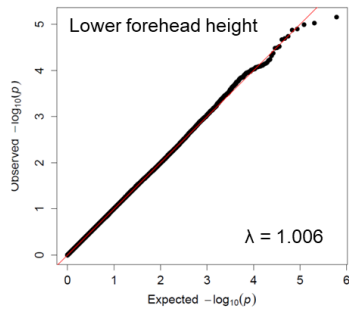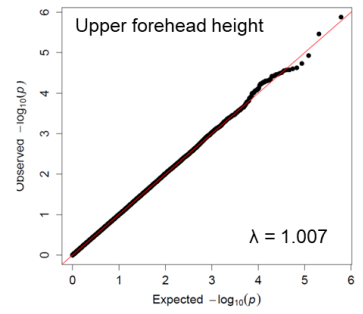

**[Forehead – depth]**

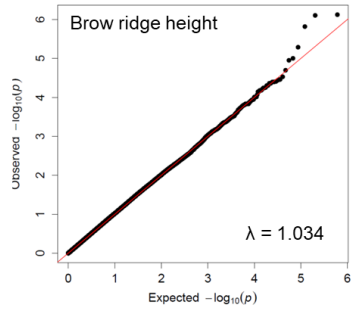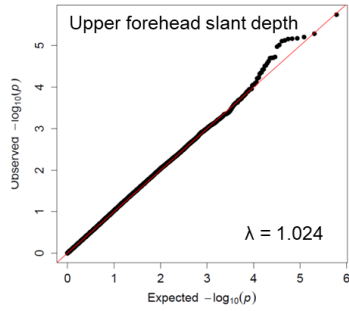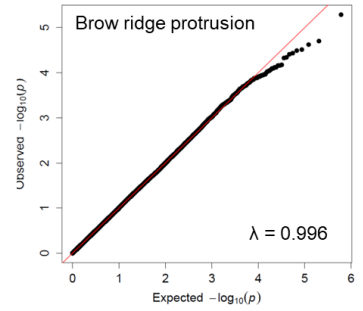

**[Forehead – angle]**

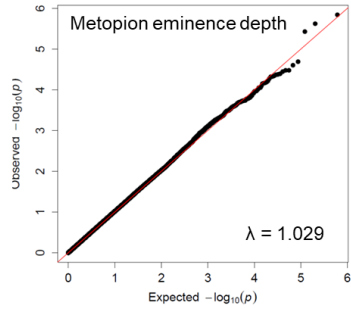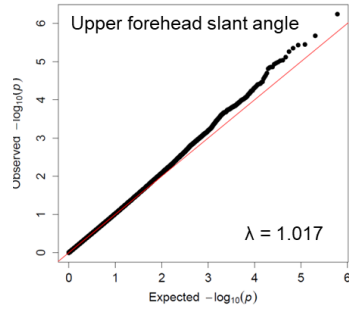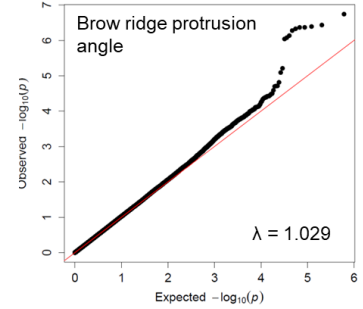

**[Forehead – ratio]**

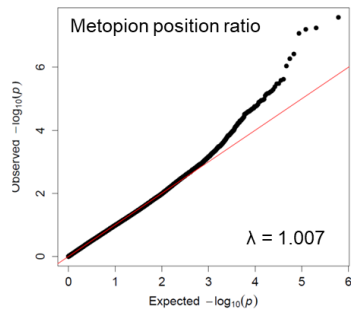

### [Eye – width]

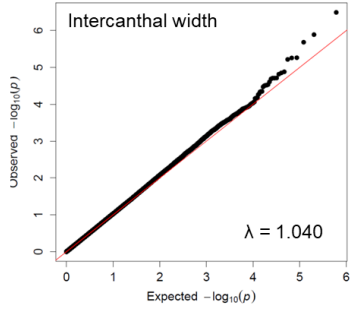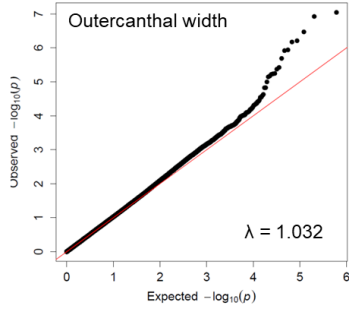

### [Eye – height]

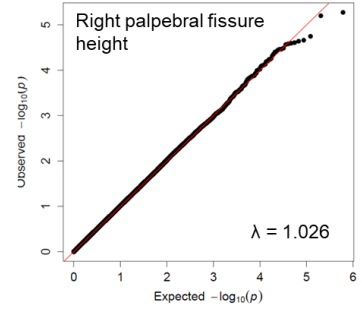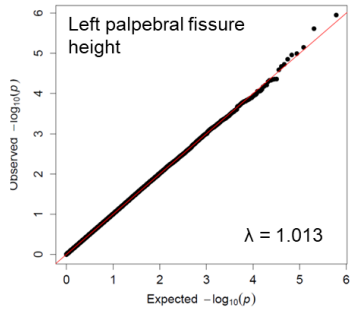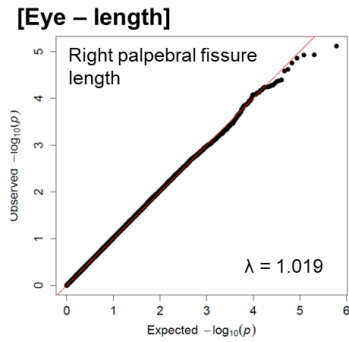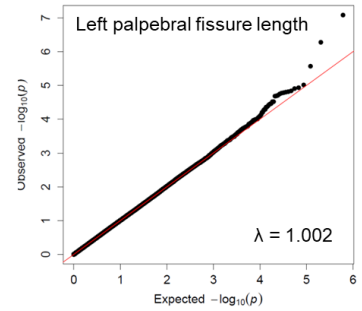

### [Eye – angle]

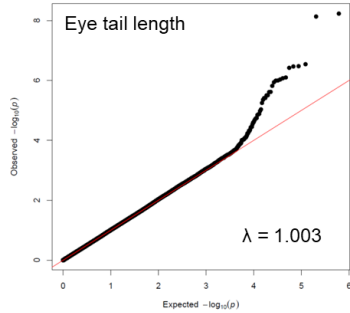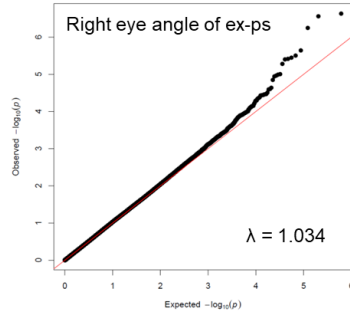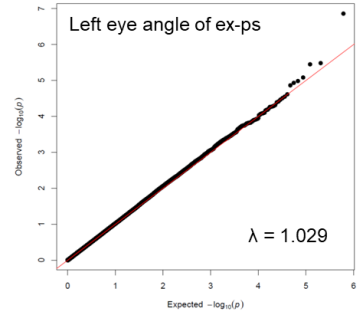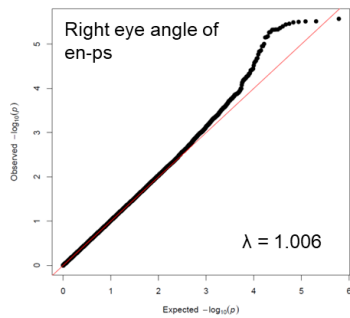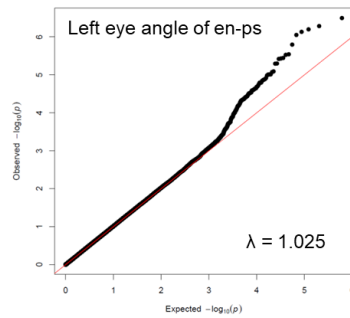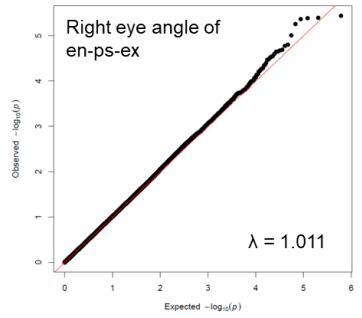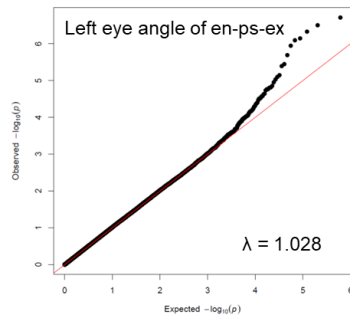

### [Eye – ratio]

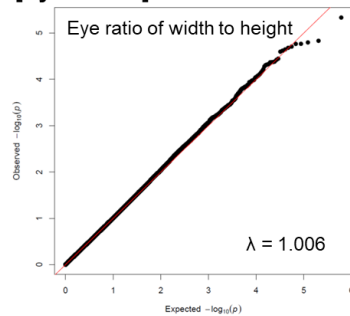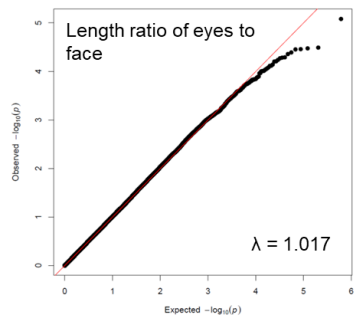

**[Nose – width]**

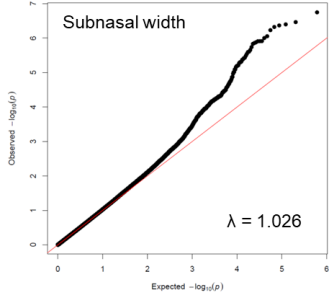

**[Nose – height]**

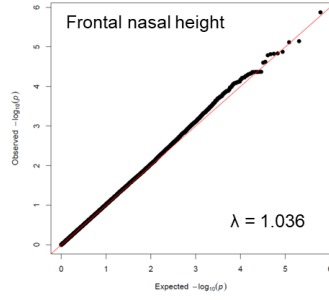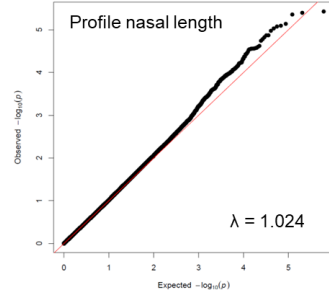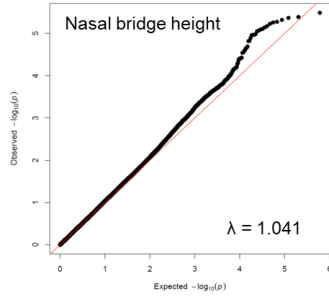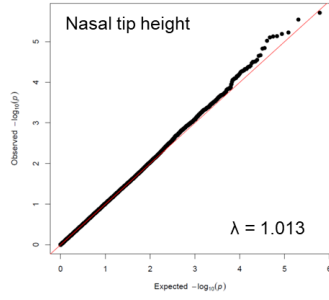

**[Nose – depth]**

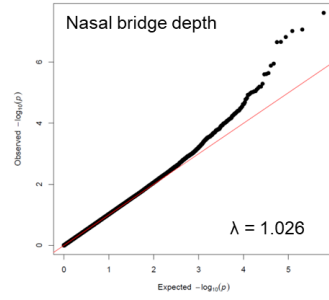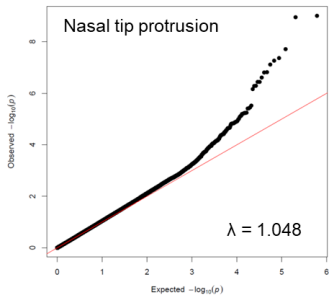

**[Nose – area]**

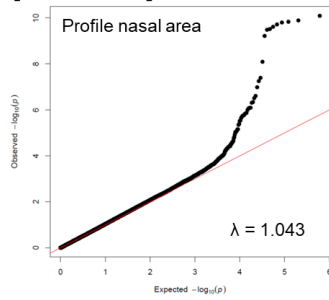

**[Nose – angle]**

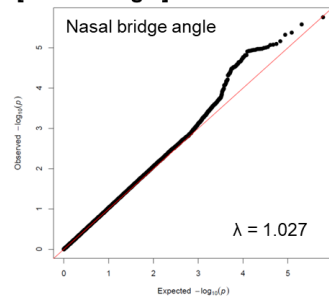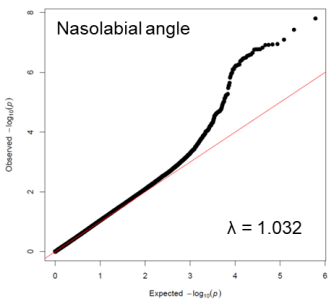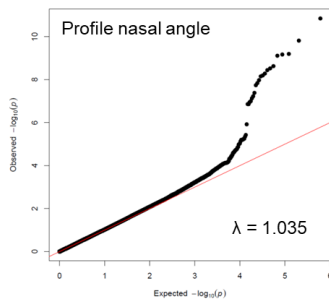

**[Mouth – height]**

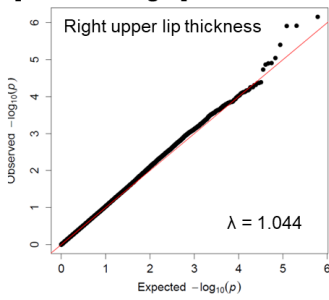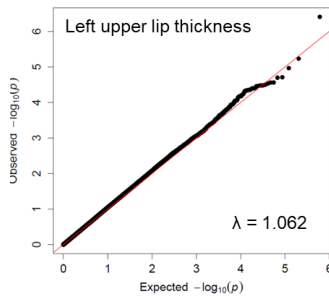

**[Upper eyelid – width]**

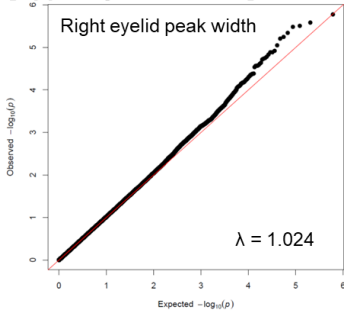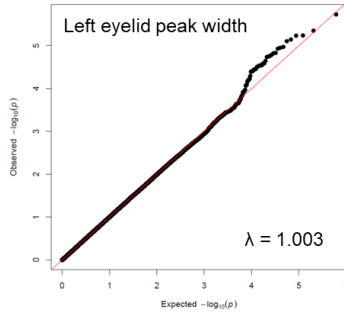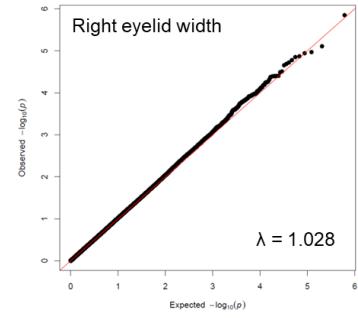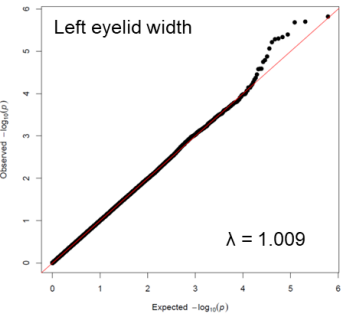

**[Upper eyelid – angle]**

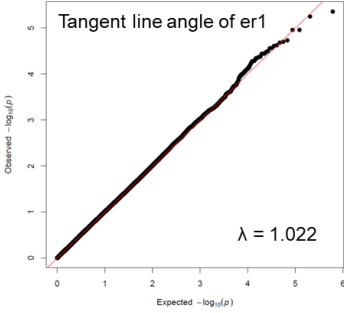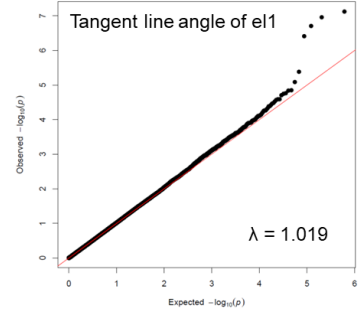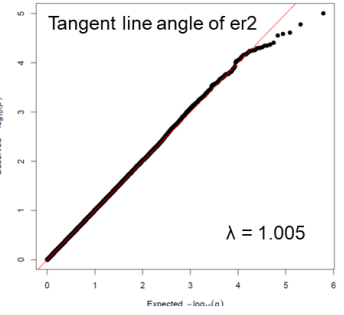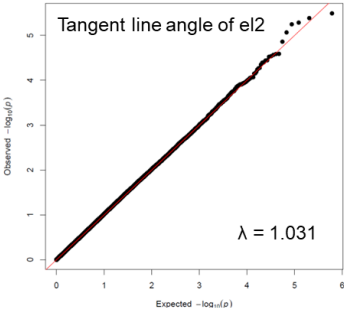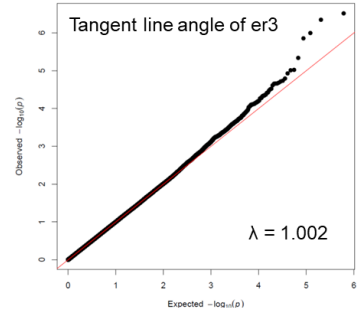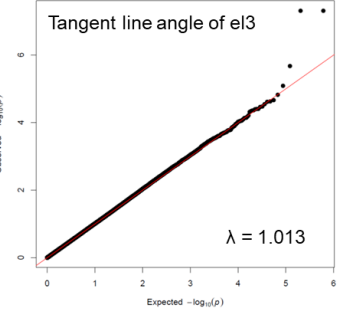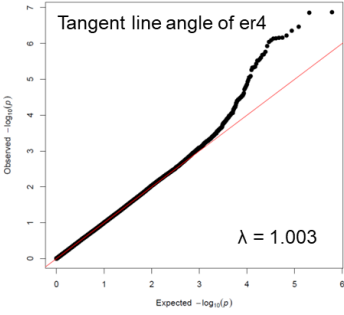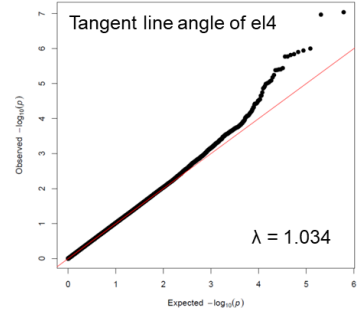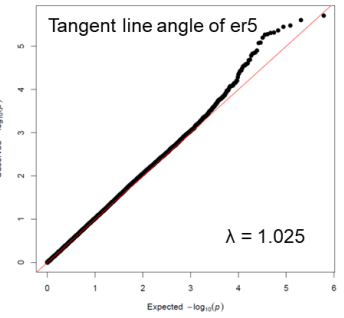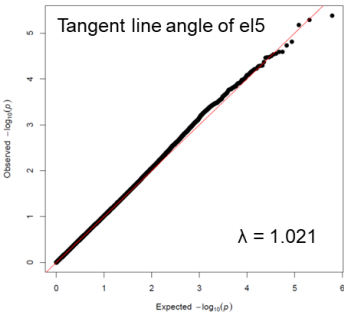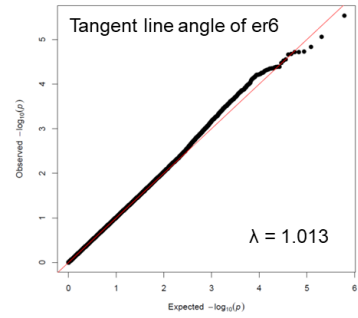

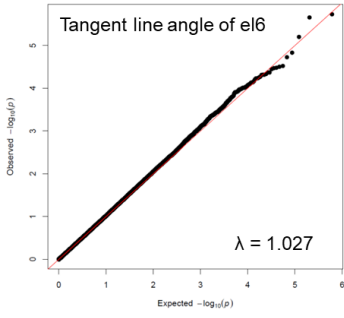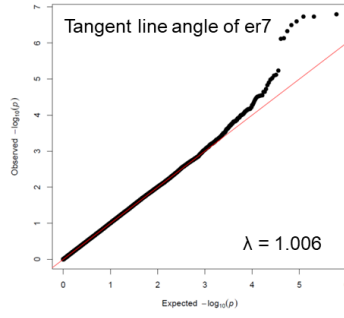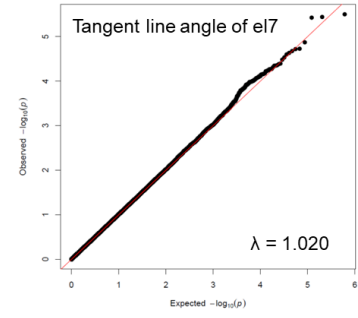

**[Upper eyelid – ratio]**

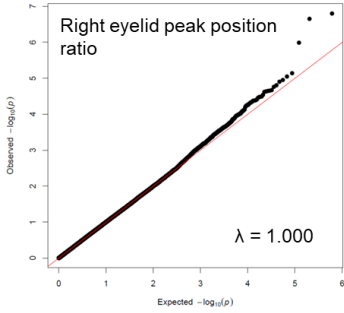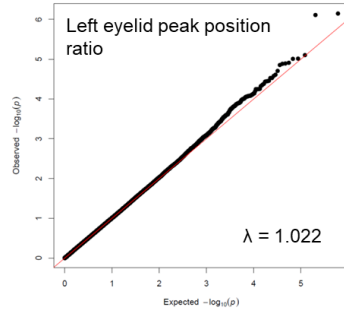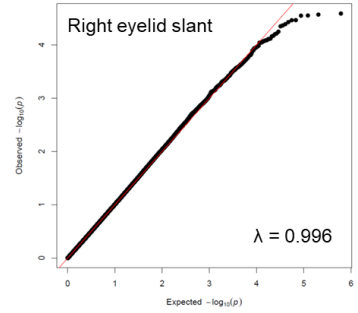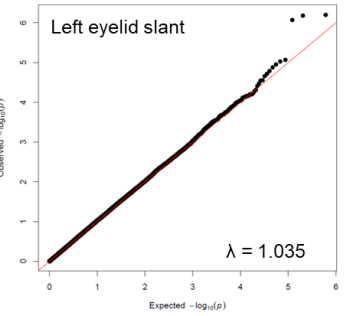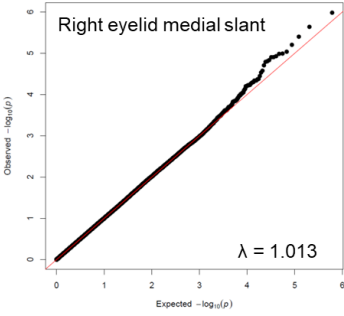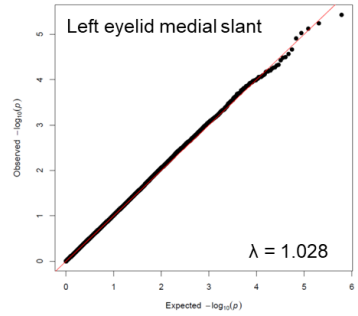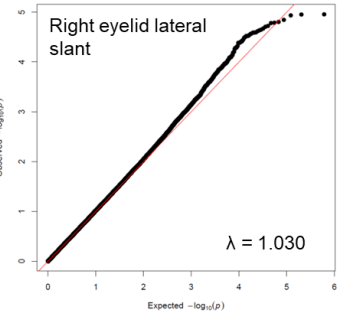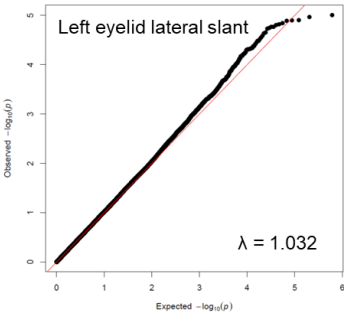

**[Upper eyelid – curvature]**

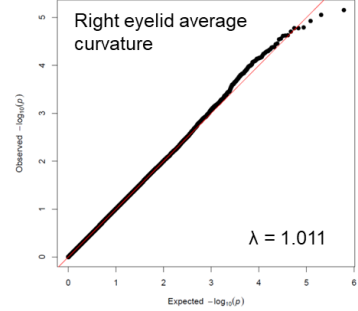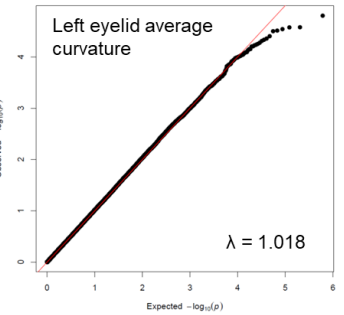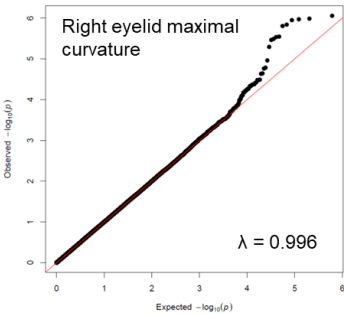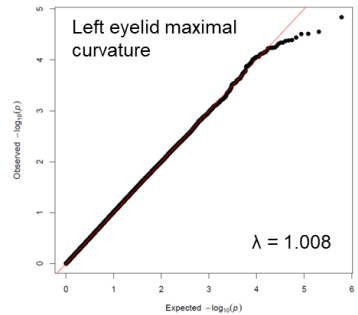

Supplement: 12864_2018_4865_MOESM6_ESM.pdf [file 12864_2018_4865_MOESM6_ESM.pdf]
