# Supplementary material for: Identification of five novel genetic loci related to facial morphology by genome-wide association studies
Source: PubMed Central journal article supplement (PMC6008943; doi:10.1186/s12864-018-4865-9), 2018-06-19

**Figure S3: Manhattan plots for the discovery GWAS (85 facial traits)**

$-\log_{10}(P)$  values are plotted against chromosomal base-pair positions. Green labels indicate significant loci showing associations with each facial trait in the discovery GWAS (Phase 1). The red line represents the genome-wide significance level ( $P = 5 \times 10^{-8}$ ), and the blue line represents the suggestive  $P$  value ( $P = 5 \times 10^{-6}$ ).

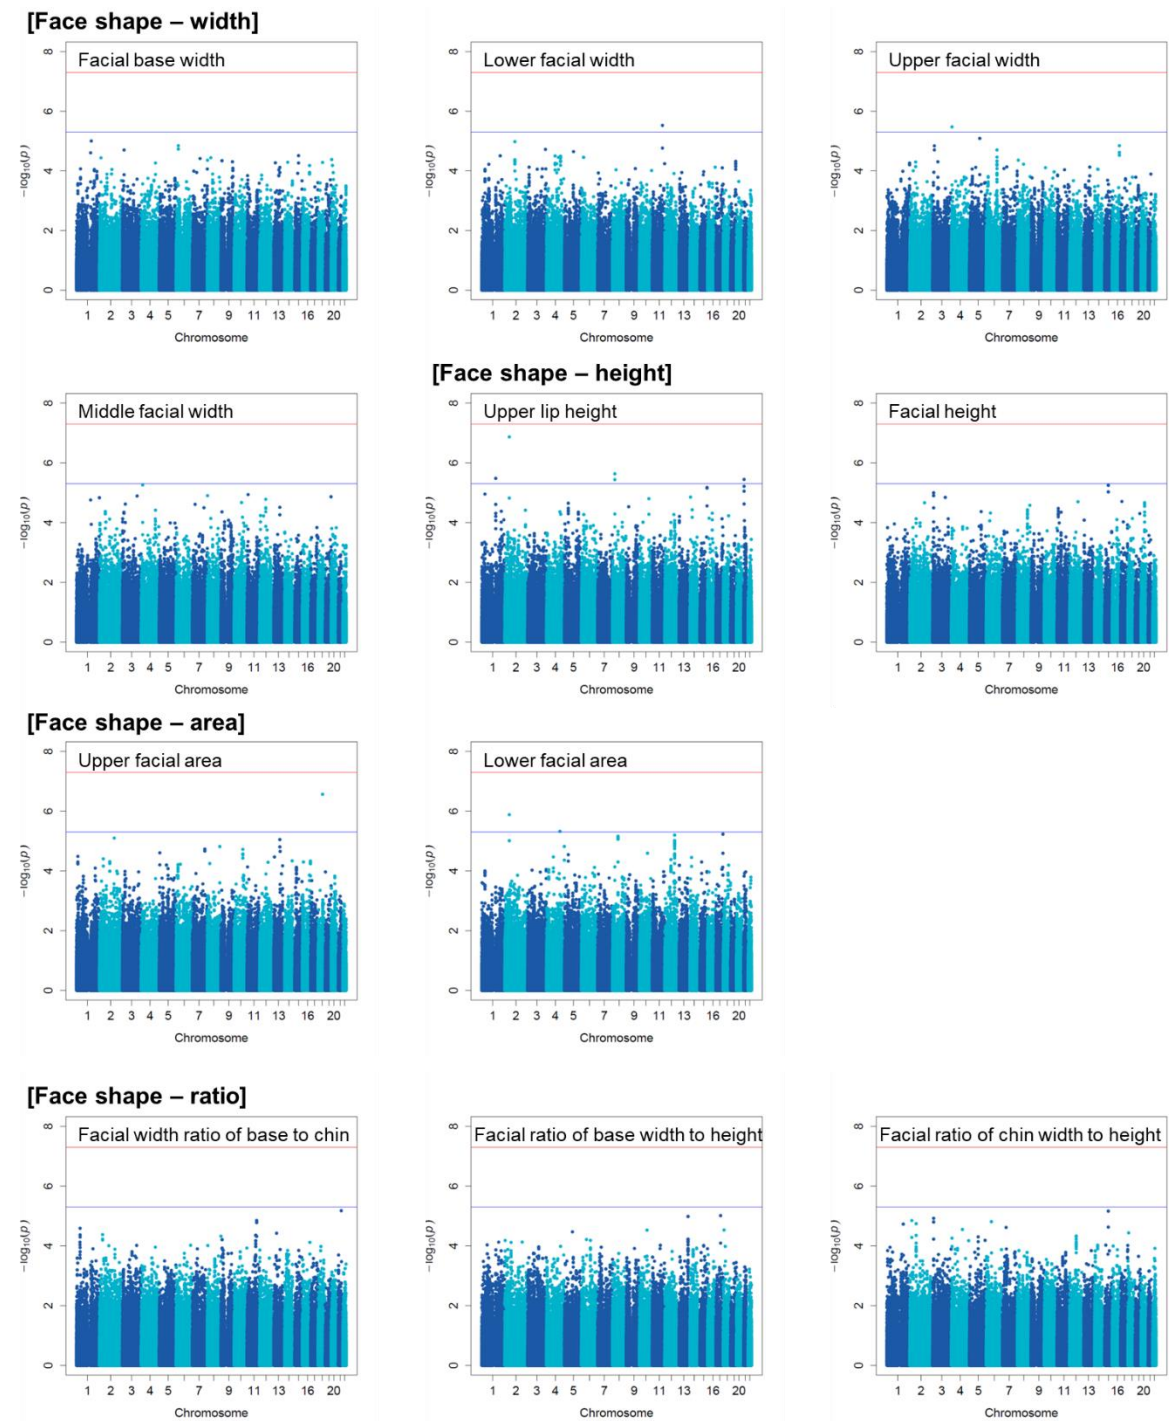



**[Forehead – ratio]**

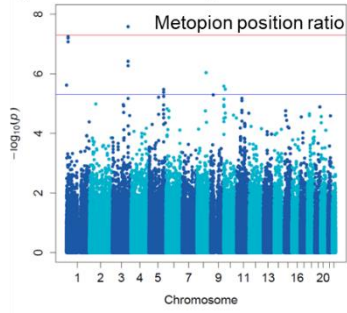

**[Eye – width]**

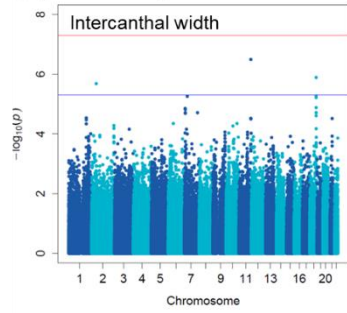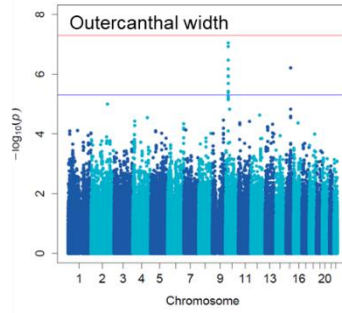

**[Eye – height]**

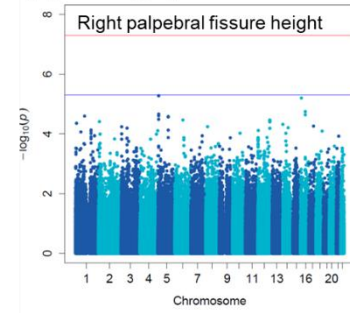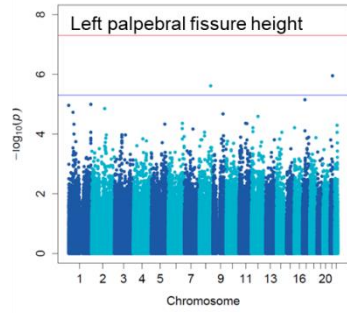

**[Eye – length]**

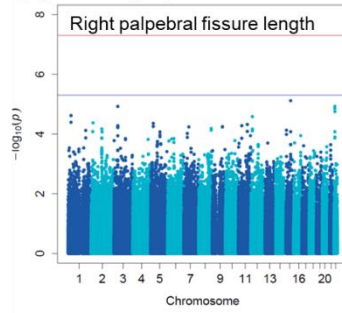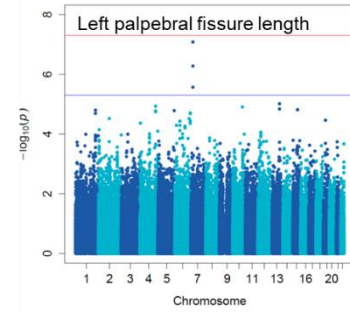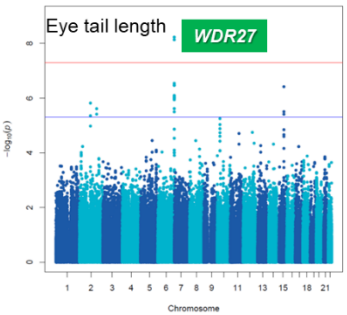

**[Eye – angle]**

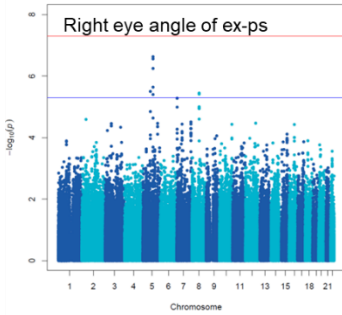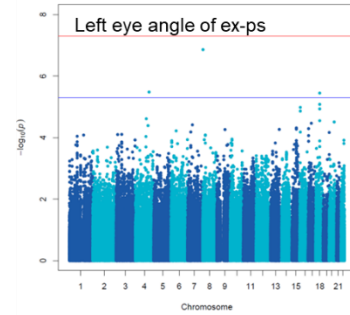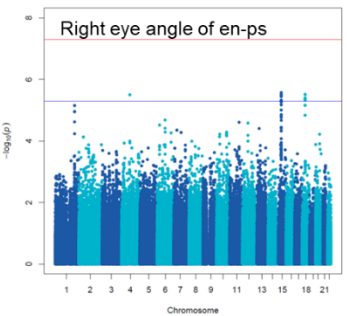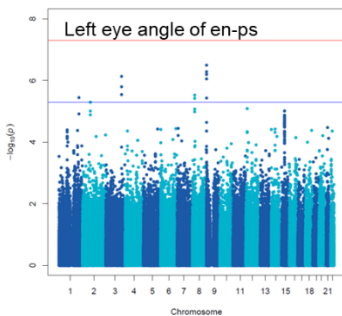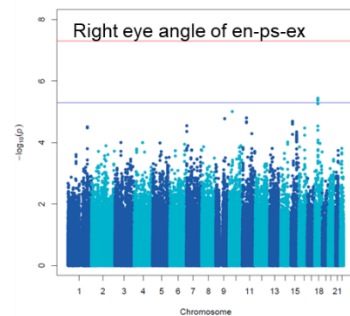

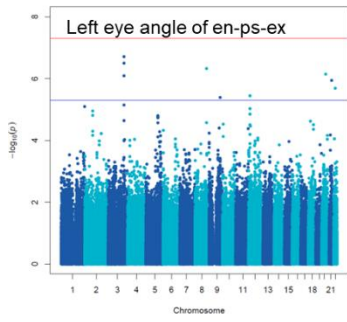

**[Eye – ratio]**

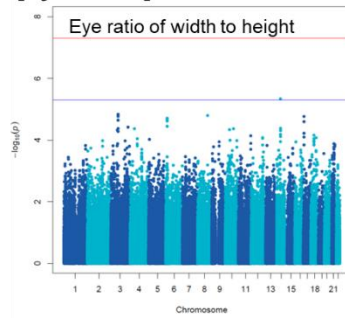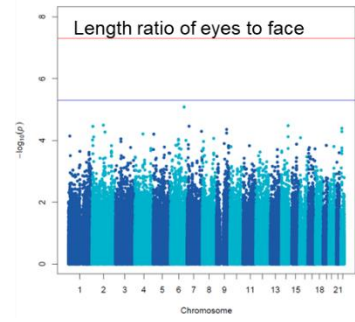

**[Nose – width]**

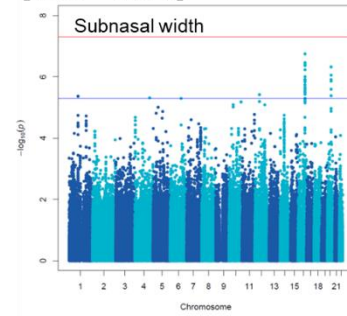

**[Nose – height]**

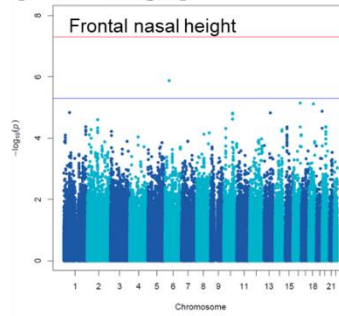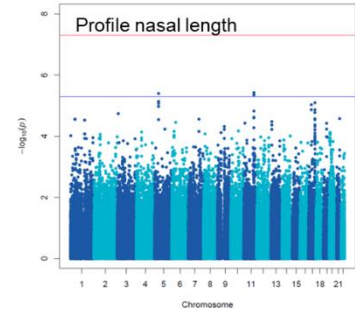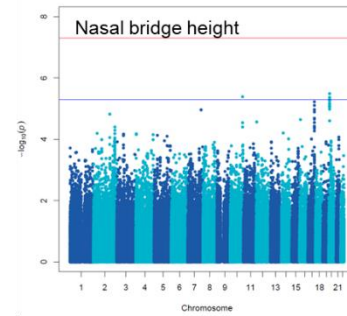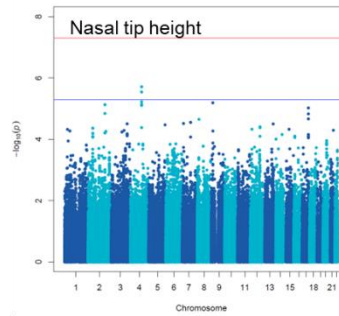

**[Nose – depth]**

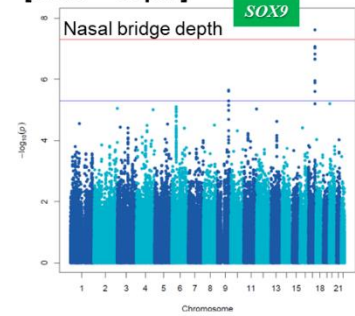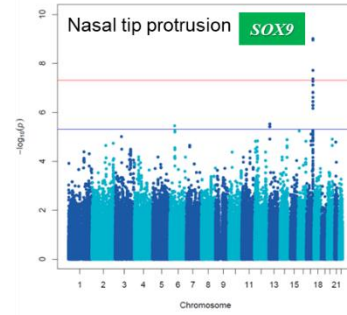

**[Nose – area]**

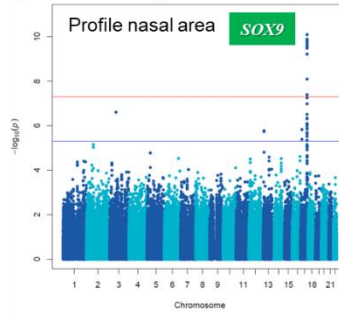

**[Nose – angle]**

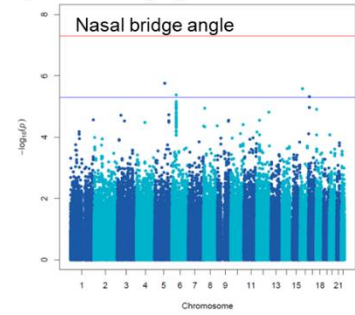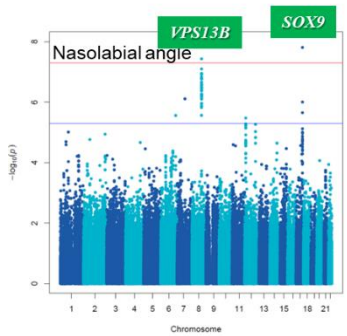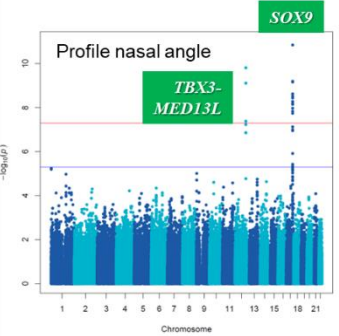

**[Mouth – height]**

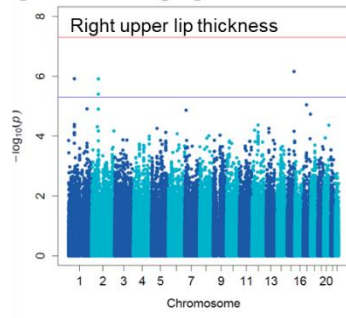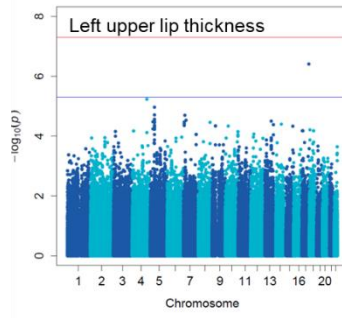

**[Upper eyelid – width]**

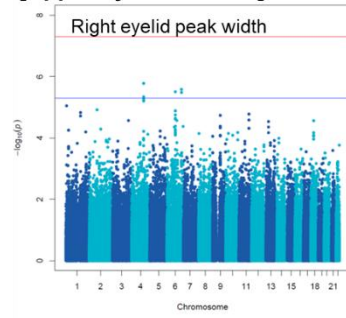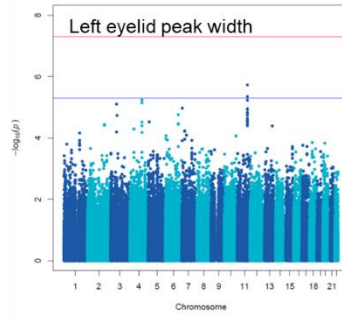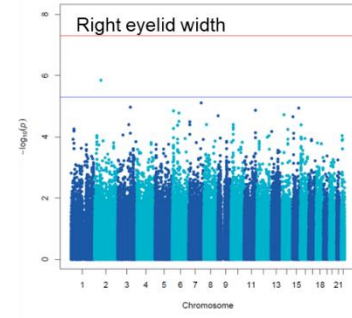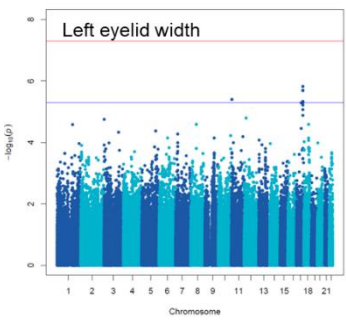

**[Upper eyelid – angle]**

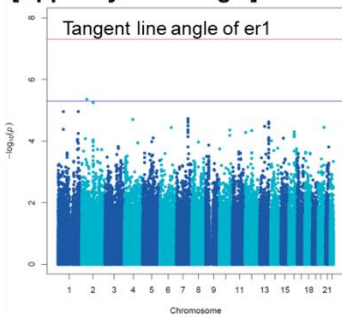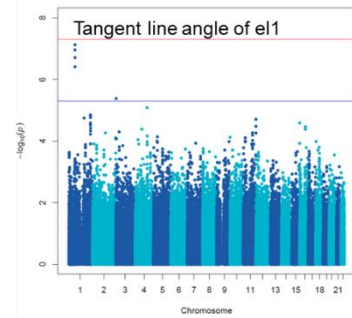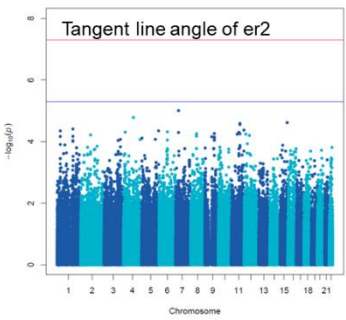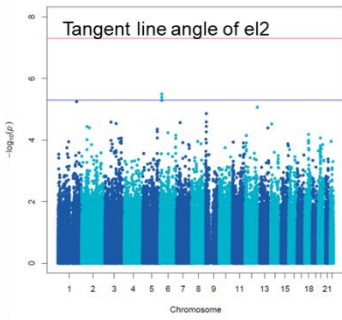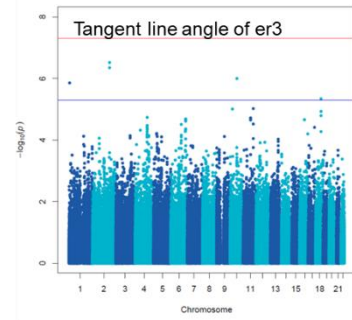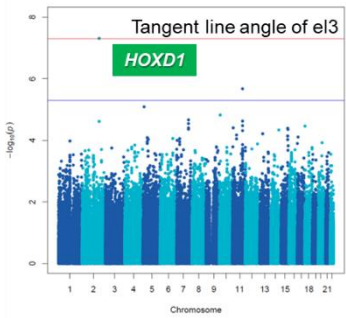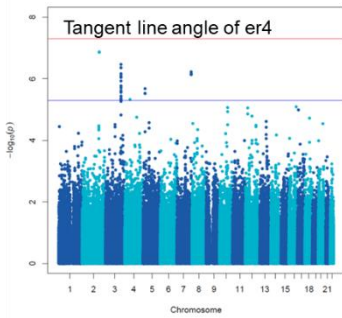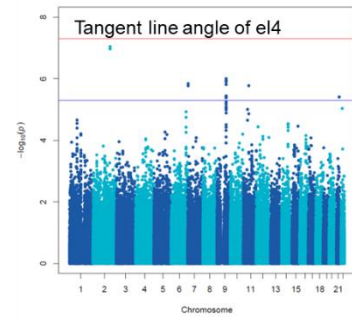

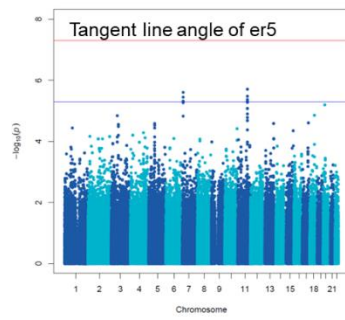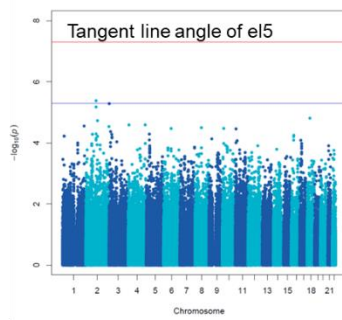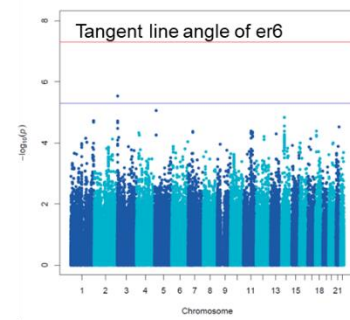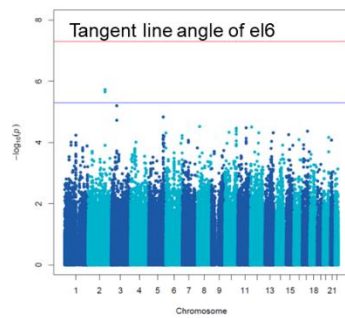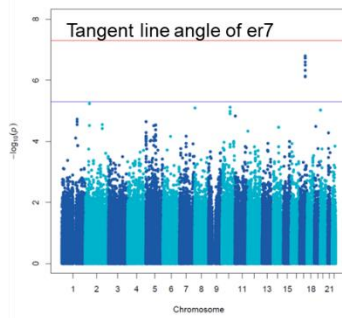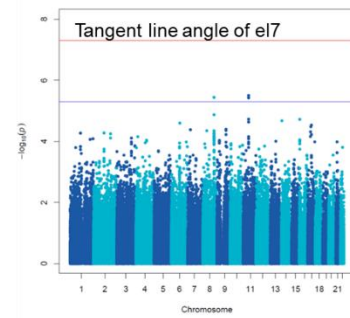

**[Upper eyelid – ratio]**

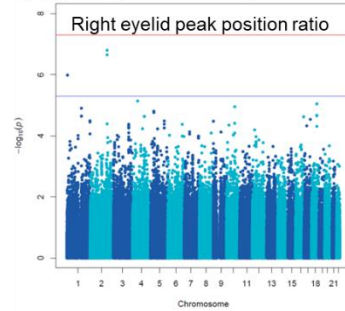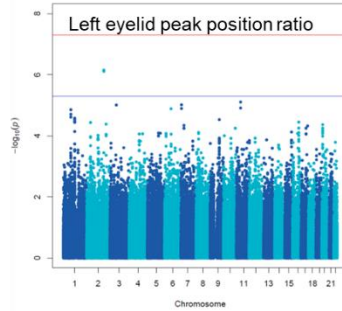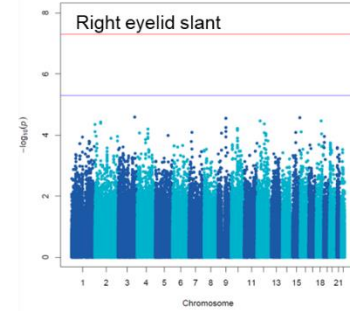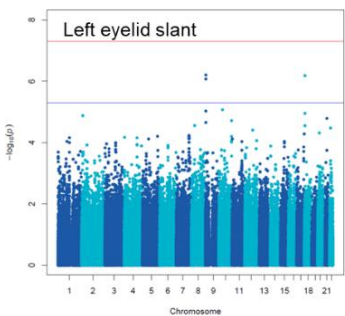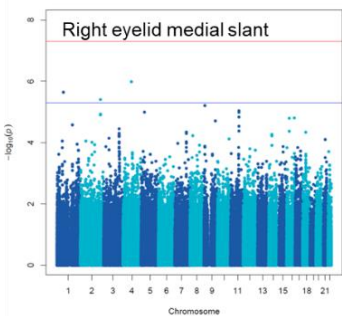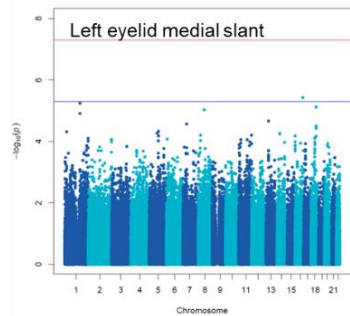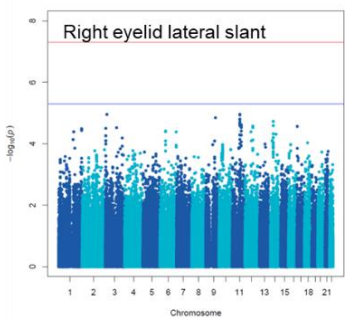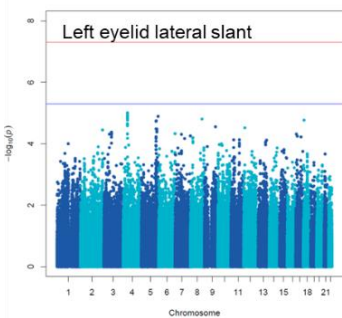

**[Upper eyelid – curvature]**

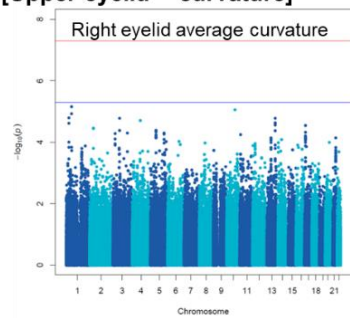

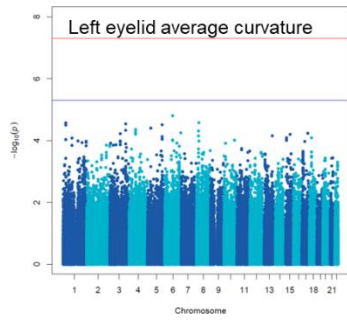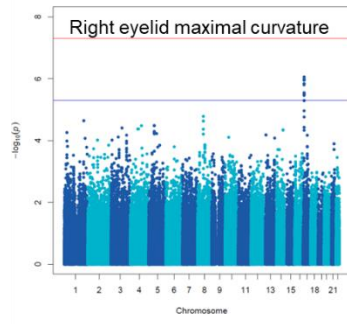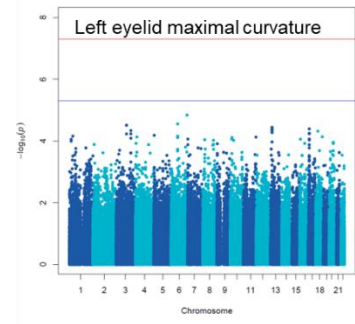

Supplement: 12864_2018_4865_MOESM7_ESM.pdf [file 12864_2018_4865_MOESM7_ESM.pdf]
