# Supplementary material for: Identification of five novel genetic loci related to facial morphology by genome-wide association studies
Source: PubMed Central journal article supplement (PMC6008943; doi:10.1186/s12864-018-4865-9), 2018-06-19

**Figure S1: Study design for facial morphology GWASs**

We carried out a discovery GWAS for 85 facial traits in 5,643 Koreans (Phase 1) and follow-up analysis in 1,926 Koreans (Phase 2) to validate 128 candidate SNPs (discovery GWAS,  $P < 5 \times 10^{-6}$ ). After the two-stage analysis, a meta-analysis (Phase 1+2) was performed.

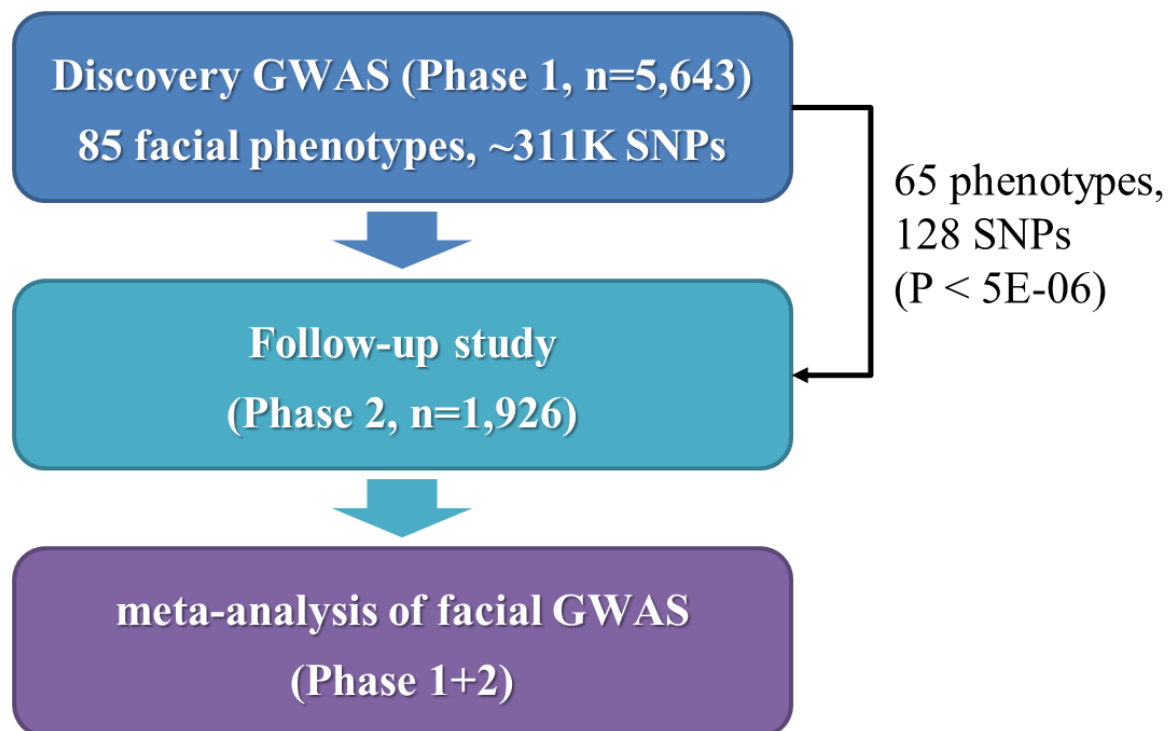

Supplement: 12864_2018_4865_MOESM4_ESM.pdf [file 12864_2018_4865_MOESM4_ESM.pdf]
