# Supplementary material for: Identification of five novel genetic loci related to facial morphology by genome-wide association studies
Source: PubMed Central journal article supplement (PMC6008943; doi:10.1186/s12864-018-4865-9), 2018-06-19
Supplement: 12864_2018_4865_MOESM11_ESM.pdf [file 12864_2018_4865_MOESM11_ESM.pdf]

**Figure S4: Multiple associations of five loci among the 85 facial traits in the discovery**

**GWAS**

Green color,  $P < 10^{-4}$ ; blue color,  $P < 10^{-5}$ ; red color,  $P < 5 \times 10^{-8}$ ; @ , ratio of two lines (same number)

**A. rs7567283 (OSRI-WDR35)**

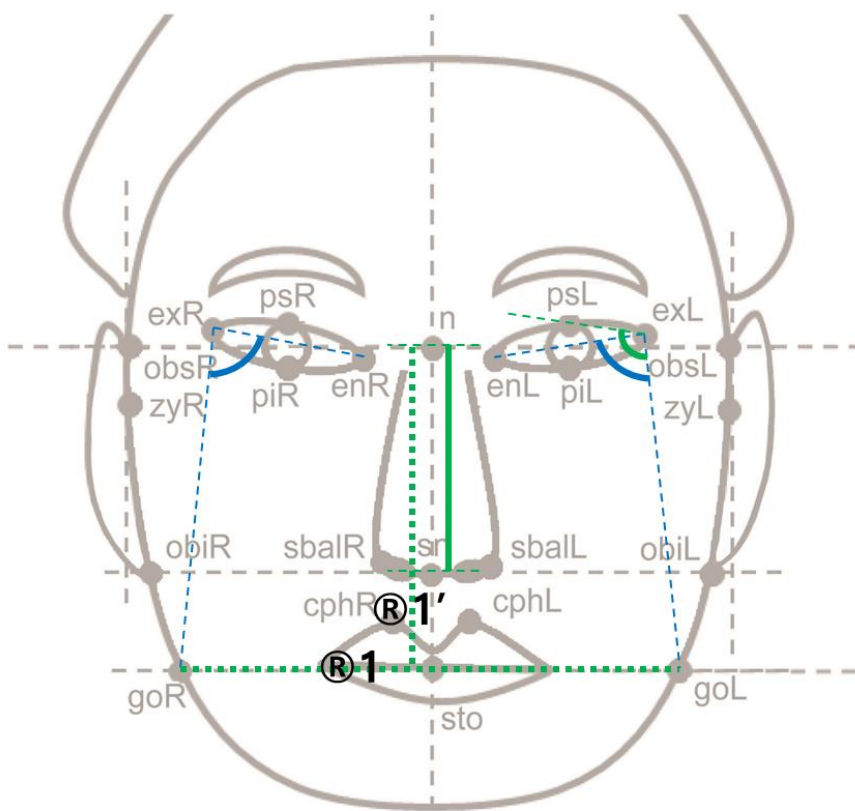

| facial traits | Phenotype | BETA                                 | P-value |          |
|---------------|-----------|--------------------------------------|---------|----------|
| Face shape    | Angle     | Left facial angle of ps-ex-go        | -0.5043 | 9.08E-05 |
|               |           | Left facial angle of en-ex-go        | -0.5252 | 1.96E-06 |
|               |           | Right facial angle of en-ex-go       | -0.5719 | 1.72E-07 |
|               | Ratio     | Facial ratio of chin width to height | -0.0148 | 1.42E-05 |
| Nose          | Height    | Frontal nasal height                 | 0.2947  | 7.82E-05 |

**B. rs970797 (*HOXD1-MTX2*)**

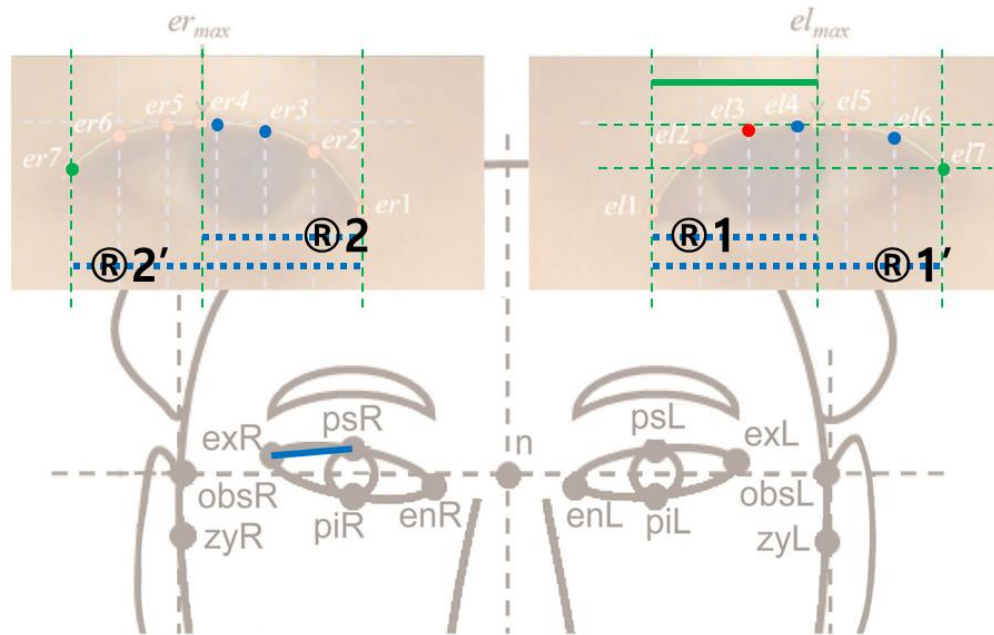

| facial traits                    |          | Phenotype                 | BETA                            | P-value  |
|----------------------------------|----------|---------------------------|---------------------------------|----------|
| Eye                              | Distance | Eye tail length           | 0.2595                          | 3.87E-06 |
|                                  |          | Tangent line angle of el3 | 0.0167                          | 4.90E-08 |
| Upper eyelid                     | Angle    | Tangent line angle of el4 | 0.0148                          | 9.12E-08 |
|                                  |          | Tangent line angle of el6 | -0.0126                         | 2.21E-06 |
|                                  |          | Tangent line angle of el7 | -0.0351                         | 5.66E-05 |
|                                  |          | Tangent line angle of er3 | 0.0148                          | 4.51E-07 |
|                                  |          | Tangent line angle of er4 | 0.0139                          | 1.39E-07 |
|                                  |          | Tangent line angle of er7 | -0.0353                         | 2.83E-05 |
|                                  |          | Ratio                     | Left eyelid peak position ratio | -0.0071  |
| Right eyelid peak position ratio | -0.0073  |                           | 2.23E-07                        |          |
|                                  | Width    | Left eyelid peak width    | -0.0196                         | 3.65E-05 |

**C. rs3736712 (WDR27)**

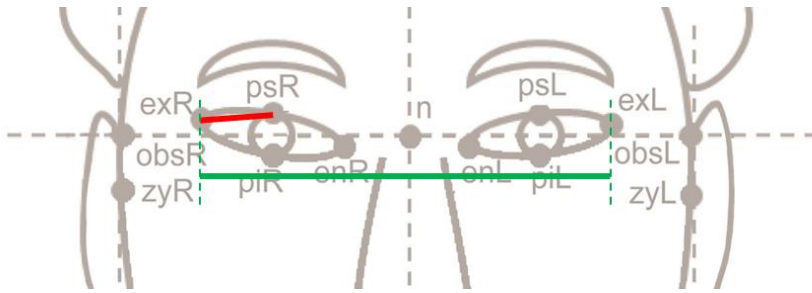

|     | facial traits | Phenotype          | BETA   | P-value  |
|-----|---------------|--------------------|--------|----------|
| Eye | Distance      | Eye tail length    | 0.3216 | 5.89E-09 |
|     | Width         | Outercanthal width | 0.4527 | 6.34E-05 |

**D. rs2193054 (SOX9)**

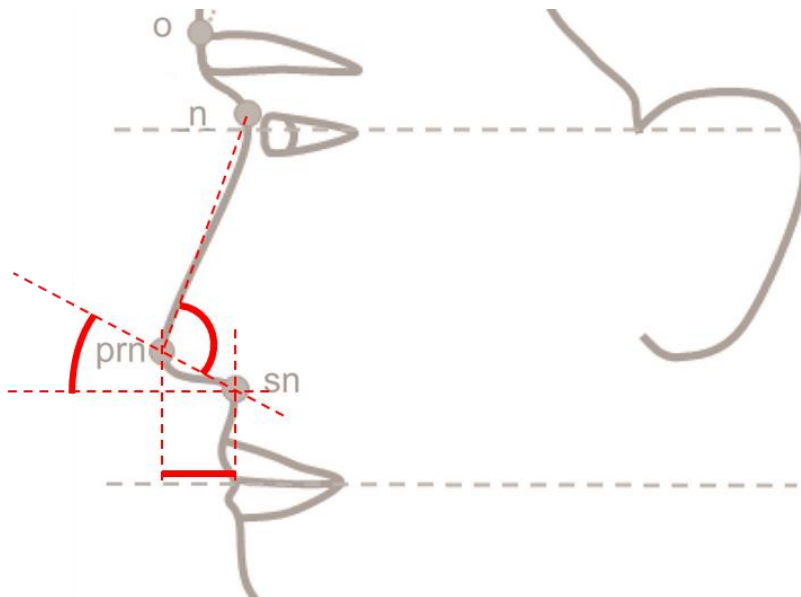

|      | facial traits | Phenotype            | BETA    | P-value  |
|------|---------------|----------------------|---------|----------|
| Nose | Angle         | Profile nasal angle  | -0.0068 | 1.43E-11 |
|      |               | Nasolabial angle     | -0.0137 | 1.56E-08 |
|      | Depth         | Nasal tip protrusion | 0.0185  | 1.93E-08 |

**E. rs2206437 (DHX35)**

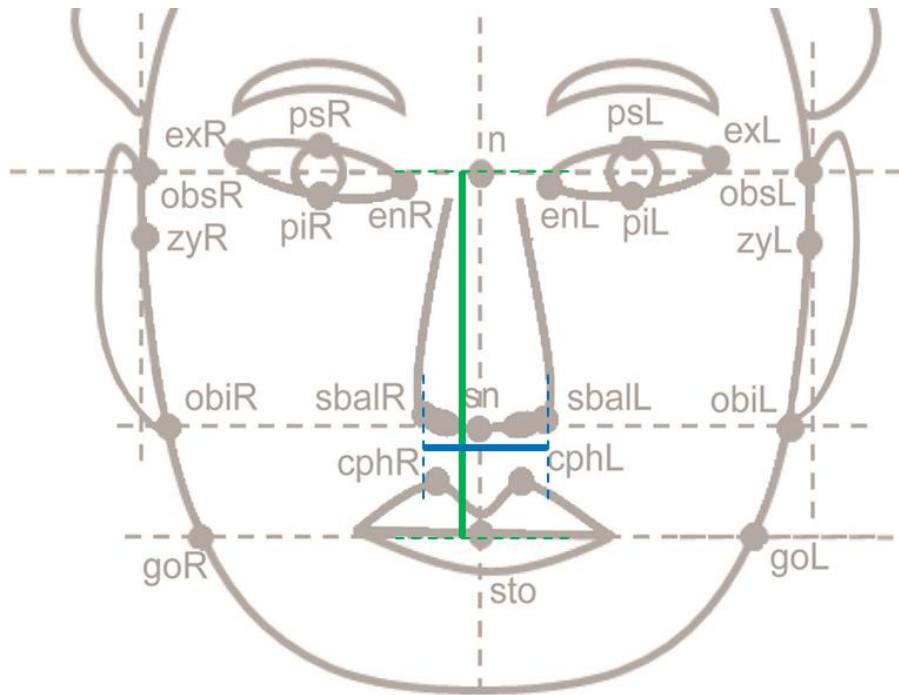

| facial traits |        | Phenotype      | BETA    | P-value  |
|---------------|--------|----------------|---------|----------|
| Face shape    | Height | Facial height  | -0.3971 | 9.59E-05 |
| Nose          | Width  | Subnasal width | -0.2724 | 4.75E-07 |
