# Supplementary material for: Identification of five novel genetic loci related to facial morphology by genome-wide association studies
Source: PubMed Central journal article supplement (PMC6008943; doi:10.1186/s12864-018-4865-9), 2018-06-19
Supplement: 12864_2018_4865_MOESM17_ESM.pdf [file 12864_2018_4865_MOESM17_ESM.pdf]

**Figure S5: The procedure for facial feature point extraction**

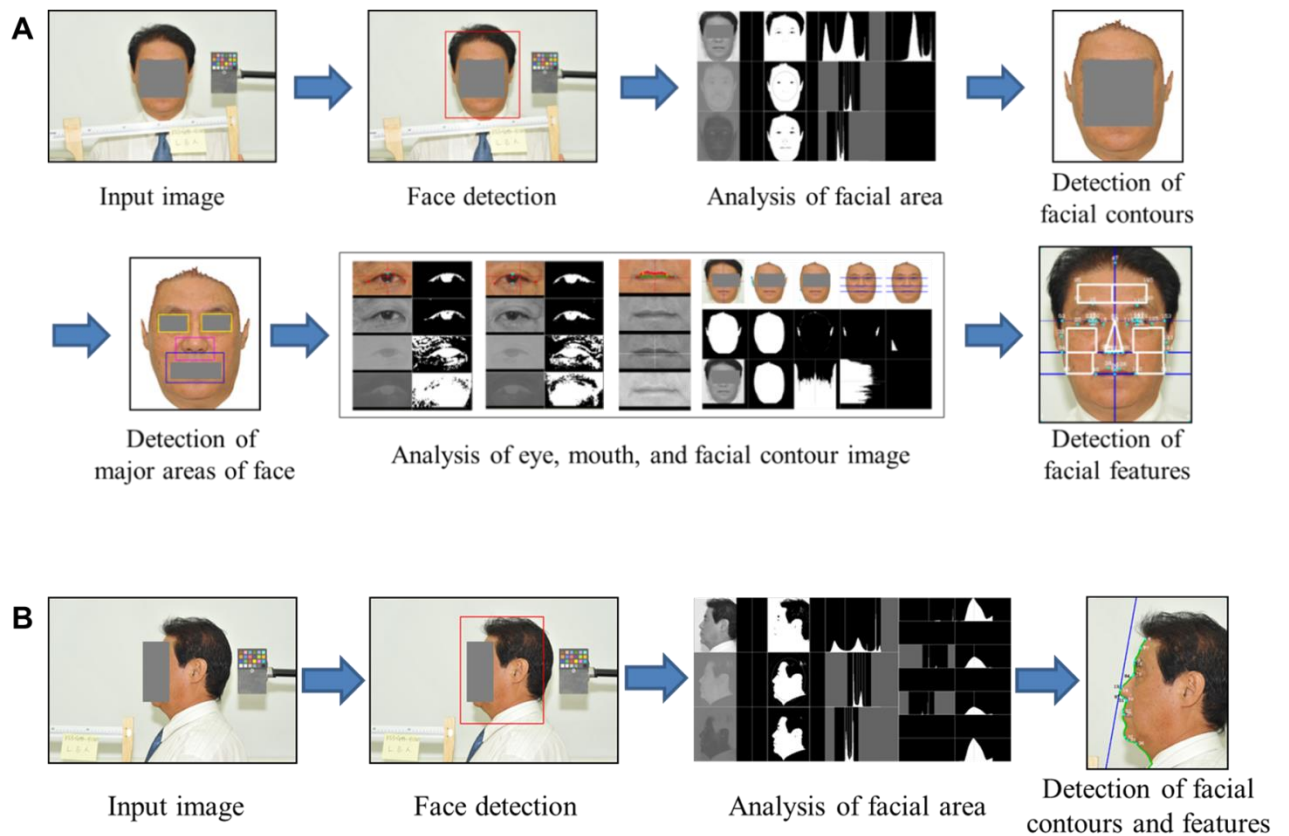

The participants were photographed with a neutral expression in both the frontal and profile views, and 23 frontal and seven lateral face points were extracted. Distance, angle, and area measurements were carried out based on in-house facial data acquisition software [25, 29].

(A) frontal image extraction, (B) lateral image extraction.
