# Supplementary material for: Identification of five novel genetic loci related to facial morphology by genome-wide association studies
Source: BMC Genomics. 2018 Jun 19;19:481. doi: 10.1186/s12864-018-4865-9 (PMC6008943; doi:10.1186/s12864-018-4865-9)
Supplement: Supplementary file 2 — Table S2. Correlations of face traits. (XLSX 88 kb) [file 12864_2018_4865_MOESM2_ESM.xlsx]

## Sheet: Table S2
Table S2. Correlations of face traits
Face group	subgroup	Phenotype	Abbreviation	Face shape (size)								Face shape (shape)									Forehead (size)				Forehead (shape)						Eye (size)						Eye (shape)									nose (size)
				Width				Height		Area		Ratio			Angle						Height				Angle		Ratio	Depth			Width		Height		Length		Angle						Length	Ratio		Width	Height
				FBW	LFW	UFW	MFW	ULH	FH	UFAR	LFAR	FWRBC	FRBWH	FRCWH	RFAEEG	LFAEEG	RFAPEG	LFAPEG	RFAEPG	LFAEPG	FHH	LFHH	UFHH	BRH	UFHSA	BRPA	MPR	UFHSD	BRP	MED	IW	OW	RPFH	LPFH	RPFL	LPFL	REAExP	LEAExP	REAEnP	LEAEnP	REAEPE	LEAEPE	RETL	ERWH	REWBW	SW	FNH	PNL	NBH
Face shape (size)	Width	Facial base width	FBW	1	<5.0E-05	<5.0E-05	<5.0E-05	<5.0E-05	<5.0E-05	<5.0E-05	<5.0E-05	0.000843602	<5.0E-05	<5.0E-05	<5.0E-05	<5.0E-05	<5.0E-05	0.0339568	<5.0E-05	<5.0E-05	<5.0E-05	<5.0E-05	<5.0E-05	<5.0E-05	0.00955319	0.0932556	0.0600575	<5.0E-05	0.468511	0.317183	<5.0E-05	<5.0E-05	9.54825e-05	<5.0E-05	<5.0E-05	<5.0E-05	<5.0E-05	<5.0E-05	<5.0E-05	<5.0E-05	<5.0E-05	<5.0E-05	<5.0E-05	<5.0E-05	0.40017	<5.0E-05	<5.0E-05	<5.0E-05	<5.0E-05
		Lower facial width	LFW	0.766	1	<5.0E-05	<5.0E-05	9.58594e-05	<5.0E-05	<5.0E-05	<5.0E-05	<5.0E-05	<5.0E-05	<5.0E-05	<5.0E-05	<5.0E-05	<5.0E-05	<5.0E-05	<5.0E-05	<5.0E-05	<5.0E-05	0.00183995	<5.0E-05	<5.0E-05	0.307105	0.555379	0.0943588	<5.0E-05	0.57939	0.00266431	0.000274648	<5.0E-05	0.579882	0.460805	<5.0E-05	<5.0E-05	<5.0E-05	<5.0E-05	<5.0E-05	<5.0E-05	<5.0E-05	<5.0E-05	<5.0E-05	<5.0E-05	0.0780926	<5.0E-05	<5.0E-05	<5.0E-05	0.00020942
		Upper facial width	UFW	0.928	0.643	1	<5.0E-05	<5.0E-05	<5.0E-05	<5.0E-05	<5.0E-05	0.310908	<5.0E-05	<5.0E-05	0.0545063	0.794064	<5.0E-05	<5.0E-05	<5.0E-05	<5.0E-05	<5.0E-05	<5.0E-05	<5.0E-05	<5.0E-05	0.000790258	0.0243255	0.0038601	<5.0E-05	0.368195	0.00891807	<5.0E-05	<5.0E-05	<5.0E-05	<5.0E-05	<5.0E-05	<5.0E-05	<5.0E-05	<5.0E-05	0.00152437	0.0580804	<5.0E-05	<5.0E-05	<5.0E-05	<5.0E-05	0.00229273	<5.0E-05	<5.0E-05	<5.0E-05	<5.0E-05
		Middle facial width	MFW	0.929	0.868	0.837	1	<5.0E-05	<5.0E-05	<5.0E-05	<5.0E-05	<5.0E-05	<5.0E-05	<5.0E-05	<5.0E-05	<5.0E-05	0.131747	0.000126447	<5.0E-05	<5.0E-05	<5.0E-05	<5.0E-05	<5.0E-05	<5.0E-05	0.804697	0.28929	0.0660093	<5.0E-05	0.613333	0.12763	<5.0E-05	<5.0E-05	0.0410496	0.000110981	<5.0E-05	<5.0E-05	<5.0E-05	<5.0E-05	<5.0E-05	<5.0E-05	<5.0E-05	<5.0E-05	<5.0E-05	<5.0E-05	0.0852308	<5.0E-05	<5.0E-05	<5.0E-05	<5.0E-05
	Height	Upper lip height	ULH	0.242	0.053	0.219	0.252	1	<5.0E-05	<5.0E-05	<5.0E-05	0.000172872	<5.0E-05	<5.0E-05	<5.0E-05	<5.0E-05	<5.0E-05	<5.0E-05	<5.0E-05	<5.0E-05	<5.0E-05	0.000287691	0.000337095	0.000313971	0.13531	<5.0E-05	0.966903	<5.0E-05	0.276443	0.814071	<5.0E-05	<5.0E-05	0.032181	0.0202193	<5.0E-05	<5.0E-05	0.267276	0.142397	0.000568209	0.0264978	0.0270479	0.00677133	<5.0E-05	<5.0E-05	<5.0E-05	<5.0E-05	<5.0E-05	<5.0E-05	<5.0E-05
		Facial height	FH	0.423	0.108	0.424	0.346	0.689	1	<5.0E-05	<5.0E-05	<5.0E-05	<5.0E-05	<5.0E-05	<5.0E-05	<5.0E-05	<5.0E-05	<5.0E-05	<5.0E-05	<5.0E-05	<5.0E-05	<5.0E-05	<5.0E-05	<5.0E-05	<5.0E-05	0.15061	<5.0E-05	<5.0E-05	0.311355	0.00876348	<5.0E-05	<5.0E-05	<5.0E-05	<5.0E-05	<5.0E-05	<5.0E-05	0.0304515	0.456055	0.0137658	<5.0E-05	0.639234	0.0222742	<5.0E-05	0.00328005	<5.0E-05	<5.0E-05	<5.0E-05	<5.0E-05	<5.0E-05
	Area	Upper facial area	UFAR	0.746	0.439	0.741	0.649	0.265	0.79	1	<5.0E-05	0.0301688	<5.0E-05	<5.0E-05	<5.0E-05	<5.0E-05	<5.0E-05	<5.0E-05	<5.0E-05	<5.0E-05	<5.0E-05	<5.0E-05	<5.0E-05	<5.0E-05	<5.0E-05	0.63466	<5.0E-05	<5.0E-05	0.604733	0.0129433	<5.0E-05	<5.0E-05	<5.0E-05	<5.0E-05	<5.0E-05	<5.0E-05	<5.0E-05	<5.0E-05	0.0660078	<5.0E-05	0.00146747	0.174694	<5.0E-05	<5.0E-05	<5.0E-05	<5.0E-05	<5.0E-05	<5.0E-05	<5.0E-05
		Lower facial area	LFAR	0.625	0.506	0.549	0.68	0.846	0.657	0.477	1	0.00857155	<5.0E-05	<5.0E-05	0.828187	0.167599	<5.0E-05	<5.0E-05	<5.0E-05	<5.0E-05	<5.0E-05	<5.0E-05	<5.0E-05	<5.0E-05	0.253216	0.000160887	0.224346	<5.0E-05	0.314663	0.224635	<5.0E-05	<5.0E-05	0.0753557	0.0100417	<5.0E-05	<5.0E-05	<5.0E-05	<5.0E-05	<5.0E-05	<5.0E-05	<5.0E-05	<5.0E-05	<5.0E-05	<5.0E-05	<5.0E-05	<5.0E-05	<5.0E-05	<5.0E-05	<5.0E-05
Face shape (shape)	Ratio	Facial width ratio of base to chin	FWRBC	-0.045	-0.157	0.0135677	-0.069	0.051	0.063	0.029	-0.036	1	<5.0E-05	<5.0E-05	<5.0E-05	<5.0E-05	<5.0E-05	<5.0E-05	<5.0E-05	<5.0E-05	0.0706325	0.25479	0.836299	0.000996582	<5.0E-05	0.591473	0.725375	0.102736	0.844754	0.359396	0.000952268	0.0429056	0.0058255	0.00387814	0.204402	0.350779	0.00383783	0.464024	0.00223935	<5.0E-05	0.000562952	0.0177545	0.716806	0.00077861	<5.0E-05	0.0077114	0.0488379	0.111928	0.255892
		Facial ratio of base width to height	FRBWH	0.143	0.293	0.149	0.164	-0.241	-0.336	-0.124	-0.085	0.484	1	<5.0E-05	<5.0E-05	<5.0E-05	<5.0E-05	<5.0E-05	<5.0E-05	<5.0E-05	<5.0E-05	<5.0E-05	0.129692	0.136242	<5.0E-05	0.402407	0.274826	<5.0E-05	0.268065	<5.0E-05	0.321773	<5.0E-05	0.157168	0.0366188	0.0359593	0.0169695	6.43715e-05	<5.0E-05	0.000916493	0.355474	<5.0E-05	<5.0E-05	0.101006	0.00127838	0.00481641	0.187413	<5.0E-05	<5.0E-05	<5.0E-05
		Facial ratio of chin width to height	FRCWH	0.143	0.509	0.104	0.238	-0.346	-0.465	-0.181	-0.098	0.457	0.837	1	<5.0E-05	<5.0E-05	<5.0E-05	<5.0E-05	<5.0E-05	<5.0E-05	<5.0E-05	<5.0E-05	0.0945495	0.184449	<5.0E-05	0.213757	0.272836	<5.0E-05	0.403618	<5.0E-05	0.0423728	0.000196161	0.00785383	0.000457136	0.00035285	0.00140682	<5.0E-05	<5.0E-05	<5.0E-05	<5.0E-05	<5.0E-05	<5.0E-05	0.00560556	<5.0E-05	0.0124402	0.70926	<5.0E-05	<5.0E-05	<5.0E-05
	Angle	Right facial angle of en-ex-go	RFAEEG	0.068	0.389	-0.0259049	0.19	-0.183	-0.369	-0.227	-0.00293911	-0.12	0.204	0.395	1	<5.0E-05	<5.0E-05	<5.0E-05	<5.0E-05	<5.0E-05	0.496539	0.00545277	0.0110582	0.970348	0.708846	0.269349	0.000262274	0.149218	0.574307	0.610234	<5.0E-05	<5.0E-05	<5.0E-05	<5.0E-05	<5.0E-05	<5.0E-05	<5.0E-05	<5.0E-05	<5.0E-05	<5.0E-05	<5.0E-05	<5.0E-05	0.0110157	<5.0E-05	<5.0E-05	0.345364	<5.0E-05	<5.0E-05	<5.0E-05
		Left facial angle of en-ex-go	LFAEEG	0.103	0.406	-0.00351774	0.221	-0.175	-0.34	-0.189	0.0186952	-0.113	0.192	0.381	0.65	1	<5.0E-05	<5.0E-05	<5.0E-05	<5.0E-05	0.0866615	0.252534	0.0928282	0.572706	0.00902258	0.472509	0.00424096	0.0781531	0.289598	0.324667	<5.0E-05	<5.0E-05	<5.0E-05	<5.0E-05	<5.0E-05	<5.0E-05	<5.0E-05	<5.0E-05	<5.0E-05	<5.0E-05	<5.0E-05	<5.0E-05	0.831609	<5.0E-05	<5.0E-05	0.0168455	<5.0E-05	<5.0E-05	<5.0E-05
		Right facial angle of ps-ex-go	RFAPEG	-0.058	0.184	-0.114	0.0204193	-0.19	-0.291	-0.196	-0.111	-0.075	0.085	0.226	0.662	0.417	1	<5.0E-05	<5.0E-05	0.00382133	0.0098734	0.00646598	0.944424	<5.0E-05	0.00049915	<5.0E-05	0.260774	<5.0E-05	0.806578	0.679307	0.000697141	<5.0E-05	<5.0E-05	<5.0E-05	<5.0E-05	<5.0E-05	<5.0E-05	<5.0E-05	<5.0E-05	<5.0E-05	<5.0E-05	<5.0E-05	<5.0E-05	<5.0E-05	<5.0E-05	<5.0E-05	<5.0E-05	<5.0E-05	0.00106031
		Left facial angle of ps-ex-go	LFAPEG	-0.029	0.211	-0.091	0.052	-0.194	-0.251	-0.155	-0.089	-0.089	0.099	0.229	0.426	0.641	0.608	1	0.0285931	<5.0E-05	0.529034	0.360162	0.70322	<5.0E-05	0.27422	<5.0E-05	0.524299	<5.0E-05	0.464774	0.199989	0.00858719	<5.0E-05	<5.0E-05	<5.0E-05	<5.0E-05	<5.0E-05	<5.0E-05	<5.0E-05	<5.0E-05	<5.0E-05	<5.0E-05	<5.0E-05	<5.0E-05	<5.0E-05	<5.0E-05	<5.0E-05	<5.0E-05	<5.0E-05	0.0870263
		Right facial angle of en-ps-go	RFAEPG	0.189	0.401	0.108	0.276	-0.102	-0.238	-0.09	0.09	-0.1	0.188	0.322	0.667	0.454	0.072	0.029	1	<5.0E-05	0.000125942	0.34293	0.000203616	<5.0E-05	<5.0E-05	<5.0E-05	0.000182436	<5.0E-05	0.490028	0.777633	<5.0E-05	0.286219	<5.0E-05	<5.0E-05	<5.0E-05	<5.0E-05	<5.0E-05	<5.0E-05	<5.0E-05	<5.0E-05	<5.0E-05	<5.0E-05	<5.0E-05	<5.0E-05	<5.0E-05	<5.0E-05	<5.0E-05	0.88311	0.000480728
		Left facial angle of en-ps-go	LFAEPG	0.192	0.4	0.106	0.275	-0.093	-0.234	-0.087	0.098	-0.089	0.19	0.333	0.449	0.684	0.039	0.073	0.627	1	<5.0E-05	0.926914	0.00254983	<5.0E-05	<5.0E-05	<5.0E-05	0.00119419	<5.0E-05	0.491154	0.822111	<5.0E-05	0.564286	<5.0E-05	<5.0E-05	<5.0E-05	<5.0E-05	<5.0E-05	<5.0E-05	<5.0E-05	<5.0E-05	<5.0E-05	<5.0E-05	0.0244595	<5.0E-05	<5.0E-05	<5.0E-05	<5.0E-05	0.147578	<5.0E-05
Forehead (size)	Height	Forehead height	FHH	0.2	0.129	0.209	0.176	0.103	0.204	0.236	0.156	-0.024679	-0.07	-0.075	0.00934178	0.0235404	-0.035	-0.00866565	0.053	0.057	1	<5.0E-05	<5.0E-05	0.269645	<5.0E-05	<5.0E-05	<5.0E-05	<5.0E-05	0.863378	<5.0E-05	0.0185176	<5.0E-05	0.0651388	0.00166405	<5.0E-05	<5.0E-05	0.0604114	0.827138	<5.0E-05	<5.0E-05	0.0240514	<5.0E-05	<5.0E-05	0.00245052	0.627834	<5.0E-05	<5.0E-05	<5.0E-05	<5.0E-05
		Lower forehead height	LFHH	0.104	0.043	0.127	0.079	0.051	0.146	0.16	0.074	-0.0156897	-0.074	-0.079	-0.038	-0.0158626	-0.038	-0.0127055	-0.013162	0.00127504	0.619	1	<5.0E-05	0.00461045	<5.0E-05	0.000209877	<5.0E-05	<5.0E-05	0.755269	<5.0E-05	0.582393	<5.0E-05	0.00219131	<5.0E-05	7.39353e-05	<5.0E-05	0.345626	0.40816	0.396692	0.00820232	0.15035	0.308633	0.0257704	0.603455	0.743563	<5.0E-05	<5.0E-05	<5.0E-05	<5.0E-05
		Upper forehead height	UFHH	0.108	0.089	0.103	0.108	0.05	0.075	0.096	0.086	-0.0028188	-0.0206694	-0.0228044	0.035	0.0230772	-0.000958505	-0.00524126	0.051	0.042	0.427	-0.257	1	0.777509	<5.0E-05	0.00379659	<5.0E-05	<5.0E-05	0.184852	<5.0E-05	0.0697404	<5.0E-05	0.953282	0.448581	<5.0E-05	0.000606696	0.305097	0.799381	0.000935232	0.000869502	0.544602	0.00204586	<5.0E-05	0.0150606	0.84199	<5.0E-05	<5.0E-05	<5.0E-05	<5.0E-05
		Brow ridge height	BRH	0.139	0.105	0.145	0.13	0.05	0.107	0.137	0.099	-0.045	-0.0205423	-0.0182987	-0.000515703	0.00782704	-0.106	-0.095	0.118	0.111	-0.0153035	-0.04	0.00392622	1	<5.0E-05	<5.0E-05	<5.0E-05	<5.0E-05	0.901276	<5.0E-05	0.118029	0.00141849	<5.0E-05	<5.0E-05	0.00090111	0.647736	<5.0E-05	<5.0E-05	<5.0E-05	<5.0E-05	<5.0E-05	<5.0E-05	0.23076	<5.0E-05	0.00184084	<5.0E-05	<5.0E-05	<5.0E-05	<5.0E-05
Forehead (shape)	Angle	Upper forehead slant angle	UFHSA	-0.035	0.0136957	-0.045	-0.00332561	-0.0202051	-0.06	-0.064	-0.0154428	0.112	0.131	0.129	-0.00500392	-0.035	0.047	0.0146833	-0.07	-0.07	-0.391	-0.449	0.101	-0.271	1	<5.0E-05	0.152884	<5.0E-05	0.824661	<5.0E-05	0.0401206	0.00341983	0.00031029	0.000131034	0.565759	0.0542643	0.000104094	0.13209	<5.0E-05	<5.0E-05	0.000236982	<5.0E-05	0.00862548	0.00352989	<5.0E-05	<5.0E-05	<5.0E-05	<5.0E-05	0.000276552
		Brow ridge protrusion angle	BRPA	0.0230189	0.00810296	0.031	0.0146026	0.061	0.0197728	-0.00657337	0.052	-0.00733378	-0.0114415	-0.0169881	0.0151865	0.00987849	-0.101	-0.093	0.116	0.108	-0.07	-0.051	-0.04	0.3	-0.315	1	<5.0E-05	<5.0E-05	<5.0E-05	<5.0E-05	<5.0E-05	0.189557	<5.0E-05	<5.0E-05	0.0170541	0.674948	<5.0E-05	<5.0E-05	<5.0E-05	<5.0E-05	<5.0E-05	<5.0E-05	0.609595	<5.0E-05	0.265785	0.010931	0.117788	0.0142875	<5.0E-05
	Ratio	Metopion position ratio	MPR	0.0267338	0.0238348	0.041	0.0262645	0.000597254	0.059	0.073	0.0174485	-0.00497909	-0.0154774	-0.0155417	-0.052	-0.041	-0.0160568	-0.00909832	-0.053	-0.046	-0.113	0.523	-0.749	-0.161	-0.0202586	-0.101	1	<5.0E-05	0.0379599	<5.0E-05	0.0620877	0.00459943	0.000426605	<5.0E-05	0.0301278	<5.0E-05	0.813877	0.746492	0.00386812	0.00346321	0.278	0.0281776	0.476731	0.0965301	0.000666389	0.110613	<5.0E-05	0.825484	0.00279069
	Depth	Upper forehead slant depth	UFHSD	0.169	0.099	0.183	0.137	0.088	0.166	0.195	0.126	-0.0222798	-0.075	-0.078	0.0198198	0.024212	-0.081	-0.057	0.121	0.118	0.645	0.203	0.61	0.23	-0.582	0.217	-0.451	1	0.00391866	<5.0E-05	0.894862	<5.0E-05	0.000118922	0.00254949	<5.0E-05	<5.0E-05	<5.0E-05	<5.0E-05	<5.0E-05	<5.0E-05	<5.0E-05	<5.0E-05	0.0148216	<5.0E-05	0.178474	<5.0E-05	<5.0E-05	<5.0E-05	<5.0E-05
		Brow ridge protrusion	BRP	-0.00993601	0.00761166	-0.0123339	-0.00695847	-0.0150997	-0.0139219	-0.00715548	-0.0139168	-0.00267403	0.0151233	0.0114046	0.00771971	0.0145561	0.00337032	0.010069	0.00950149	0.00949215	0.00237295	0.0043373	-0.0182681	0.00172717	0.00302548	-0.254	0.03	-0.04	1	0.573475	0.431559	0.925613	0.389599	0.26906	0.976628	0.611285	0.9444	0.578676	0.201095	0.265455	0.686546	0.856846	0.950664	0.166585	0.680123	0.431344	0.918514	0.398503	0.0023406
		Metopion eminence depth	MED	0.0137592	-0.041	0.036	-0.0210593	0.00327537	0.036	0.034	-0.0168713	-0.0125634	-0.067	-0.077	0.0070313	0.0135892	0.00571125	0.0177123	-0.00390107	0.00311141	0.601	0.545	0.198	0.122	-0.614	0.073	-0.167	0.634	-0.0077941	1	0.264314	0.00465045	0.405399	0.529174	0.0539884	0.00988881	0.156266	0.00266755	0.602751	0.0240883	0.0993198	0.982407	0.357674	0.0180084	0.000647768	0.275084	0.00465203	<5.0E-05	<5.0E-05
Eye (size)	Width	Intercanthal width	IW	0.125	0.049	0.128	0.097	0.13	0.166	0.151	0.137	0.044	0.0132641	-0.027	-0.057	-0.067	-0.046	-0.035	-0.186	-0.213	0.032	0.00761419	0.0248714	0.0216665	0.027	-0.079	-0.0265759	-0.00181451	0.0107989	0.0153836	1	<5.0E-05	<5.0E-05	<5.0E-05	<5.0E-05	<5.0E-05	0.138071	0.011394	<5.0E-05	<5.0E-05	0.000129784	<5.0E-05	<5.0E-05	<5.0E-05	<5.0E-05	<5.0E-05	<5.0E-05	<5.0E-05	<5.0E-05
		Outercanthal width	OW	0.562	0.457	0.554	0.554	0.235	0.393	0.53	0.443	0.027	0.054	0.05	-0.151	-0.145	-0.29	-0.292	0.0143474	0.00776864	0.142	0.068	0.092	0.044	0.039	-0.017984	0.04	0.087	-0.00127929	-0.039	0.143	1	<5.0E-05	<5.0E-05	<5.0E-05	<5.0E-05	<5.0E-05	<5.0E-05	0.0422845	0.676928	0.000257911	<5.0E-05	<5.0E-05	<5.0E-05	<5.0E-05	<5.0E-05	<5.0E-05	<5.0E-05	<5.0E-05
	Height	Right palpebral fissure height	RPFH	0.052	-0.0074421	0.101	0.028	0.029	0.11	0.135	0.0240925	0.037	-0.0188814	-0.035	-0.274	-0.233	0.193	0.133	-0.539	-0.397	0.0252403	0.042	0.000801158	-0.106	0.048	-0.087	0.05	-0.053	-0.011778	0.0114342	-0.084	0.2	1	<5.0E-05	<5.0E-05	<5.0E-05	<5.0E-05	<5.0E-05	<5.0E-05	<5.0E-05	<5.0E-05	<5.0E-05	<5.0E-05	<5.0E-05	<5.0E-05	0.0222911	<5.0E-05	0.0652779	0.552149
		Left palpebral fissure height	LPFH	0.071	0.00992602	0.122	0.052	0.032	0.138	0.165	0.035	0.039	-0.028	-0.047	-0.23	-0.259	0.122	0.2	-0.419	-0.504	0.043	0.064	0.0103749	-0.113	0.051	-0.094	0.06	-0.041	-0.0151457	0.00865616	-0.09	0.239	0.675	1	<5.0E-05	<5.0E-05	<5.0E-05	<5.0E-05	<5.0E-05	<5.0E-05	<5.0E-05	<5.0E-05	<5.0E-05	<5.0E-05	<5.0E-05	0.355039	<5.0E-05	0.518917	0.00269377
	Length	Right palpebrale fissure length	RPFL	0.414	0.375	0.405	0.428	0.137	0.248	0.367	0.314	-0.0169678	0.028	0.048	-0.119	-0.067	-0.251	-0.184	0.123	0.074	0.119	0.055	0.069	0.046	0.00767887	0.033	0.031	0.089	0.000401791	-0.0265201	-0.3	0.745	0.276	0.165	1	<5.0E-05	<5.0E-05	<5.0E-05	<5.0E-05	<5.0E-05	<5.0E-05	<5.0E-05	<5.0E-05	<5.0E-05	<5.0E-05	<5.0E-05	<5.0E-05	<5.0E-05	<5.0E-05
		Left palpebrale fissure length	LPFL	0.393	0.332	0.392	0.397	0.135	0.252	0.37	0.294	0.0125328	0.032	0.043	-0.095	-0.119	-0.188	-0.248	0.058	0.089	0.088	0.064	0.047	0.00635357	0.0258489	0.0057776	0.073	0.061	-0.00700129	-0.036	-0.318	0.74	0.141	0.304	0.563	1	<5.0E-05	<5.0E-05	<5.0E-05	<5.0E-05	<5.0E-05	<5.0E-05	<5.0E-05	<5.0E-05	<5.0E-05	<5.0E-05	<5.0E-05	<5.0E-05	<5.0E-05
Eye (shape)	Angle	Right eye angle of ex-ps	REAExP	-0.223	-0.206	-0.21	-0.223	-0.0150726	-0.029	-0.12	-0.133	0.039	-0.053	-0.06	0.262	0.131	0.741	0.461	-0.315	-0.239	-0.0257756	-0.0130598	-0.0140673	-0.145	0.052	-0.127	0.00335554	-0.098	0.000957735	0.0195397	0.0199523	-0.131	0.389	0.28	-0.131	-0.112	1	<5.0E-05	<5.0E-05	<5.0E-05	<5.0E-05	<5.0E-05	0.337193	<5.0E-05	0.409875	<5.0E-05	0.35455	0.0167849	0.00127713
		Left eye angle of ex-ps	LEAExP	-0.213	-0.209	-0.208	-0.213	-0.0199317	-0.0100397	-0.106	-0.13	0.00981321	-0.08	-0.089	0.149	0.234	0.467	0.723	-0.245	-0.312	0.00300086	0.011465	-0.00348984	-0.148	0.0201802	-0.12	-0.00461128	-0.062	0.00763391	0.041	0.034	-0.124	0.281	0.42	-0.122	-0.103	0.602	1	<5.0E-05	<5.0E-05	<5.0E-05	<5.0E-05	0.585964	<5.0E-05	0.559933	<5.0E-05	0.936514	0.530606	<5.0E-05
		Right eye angle of en-ps	REAEnP	-0.083	-0.14	-0.043	-0.121	-0.047	0.033	0.0249704	-0.102	0.041	-0.044	-0.072	-0.426	-0.269	0.106	0.107	-0.875	-0.518	-0.065	-0.0117535	-0.045	-0.131	0.097	-0.128	0.041	-0.139	-0.0175768	-0.00718175	0.131	-0.027	0.546	0.412	-0.096	-0.062	0.233	0.229	1	<5.0E-05	<5.0E-05	<5.0E-05	<5.0E-05	<5.0E-05	0.0428333	<5.0E-05	<5.0E-05	<5.0E-05	0.000254609
		Left eye angle of en-ps	LEAEnP	-0.062	-0.13	-0.025618	-0.102	-0.03	0.065	0.055	-0.089	0.077	-0.0124235	-0.056	-0.293	-0.472	0.077	0.086	-0.532	-0.885	-0.091	-0.037	-0.046	-0.116	0.1	-0.12	0.042	-0.15	-0.0153498	-0.031	0.156	-0.00561384	0.388	0.503	-0.055	-0.055	0.214	0.219	0.54	1	<5.0E-05	<5.0E-05	<5.0E-05	<5.0E-05	0.0109507	<5.0E-05	<5.0E-05	<5.0E-05	0.0513655
		Right eye angle of en-ps-ex	REAEPE	0.126	0.148	0.113	0.135	0.03	0.00628522	0.043	0.103	-0.046	0.055	0.071	0.108	0.065	-0.313	-0.18	0.638	0.315	0.031	0.0198154	-0.00826499	0.107	-0.049	0.107	0.0153754	0.06	0.00551069	-0.0225906	-0.051	0.049	-0.409	-0.267	0.094	0.073	-0.466	-0.291	-0.7	-0.332	1	<5.0E-05	<5.0E-05	<5.0E-05	<5.0E-05	<5.0E-05	0.0829386	0.00047036	0.834367
		Left eye angle of en-ps-ex	LEAEPE	0.154	0.196	0.115	0.176	0.037	-0.031	0.0184031	0.129	-0.032	0.063	0.095	0.132	0.218	-0.3	-0.45	0.513	0.813	0.059	0.0140846	0.042	0.154	-0.083	0.144	-0.031	0.139	0.00247423	-0.000303537	-0.14	0.073	-0.424	-0.583	0.11	0.111	-0.46	-0.672	-0.517	-0.823	0.401	1	0.000273996	<5.0E-05	0.00908093	<5.0E-05	<5.0E-05	<5.0E-05	0.243761
	Length	Right eye tail length	RETL	0.269	0.256	0.255	0.285	0.093	0.152	0.222	0.213	-0.00484911	0.0219215	0.037	-0.034	0.00286137	-0.182	-0.084	-0.096	-0.03	0.082	0.031	0.057	-0.0165882	0.035	0.00700599	0.0101264	0.033	-0.000848417	-0.0126585	-0.104	0.679	0.317	0.185	0.794	0.447	0.0128837	0.00732428	0.167	0.076	-0.097	-0.049	1	<5.0E-05	<5.0E-05	<5.0E-05	<5.0E-05	0.00184231	0.442514
	Ratio	Eye ratio of width to height	ERWH	-0.195	-0.228	-0.143	-0.227	-0.056	-0.039	-0.088	-0.161	0.045	-0.043	-0.064	-0.193	-0.186	0.348	0.24	-0.601	-0.429	-0.041	0.00717123	-0.033	-0.133	0.039	-0.105	0.0236002	-0.096	-0.0189267	0.032	0.097	-0.252	0.796	0.556	-0.317	-0.202	0.466	0.344	0.588	0.409	-0.457	-0.475	-0.162	1	<5.0E-05	<5.0E-05	0.898338	<5.0E-05	0.110619
		Ratio of eye width to base width	REWBW	0.0112608	0.0236241	0.041	0.0231444	0.055	0.087	0.066	0.06	0.067	0.038	0.033	-0.151	-0.15	-0.146	-0.158	-0.066	-0.066	-0.0066187	0.00450741	0.00271946	-0.043	0.055	0.0152055	0.048	-0.0183719	0.00563016	-0.047	-0.309	0.428	0.164	0.198	0.473	0.573	0.0110345	0.00781245	0.027	0.034	0.104	-0.035	0.388	-0.098	1	<5.0E-05	<5.0E-05	0.13809	0.103801
Nose (size)	Width	Subnasal width	SW	0.327	0.307	0.305	0.332	0.134	0.281	0.367	0.267	-0.036	-0.0177572	0.00502269	0.0127879	0.032	-0.092	-0.068	0.128	0.12	0.167	0.08	0.081	0.096	-0.084	0.035	0.022865	0.169	0.0108697	0.0151338	0.082	0.325	-0.031	-0.0125005	0.23	0.218	-0.114	-0.101	-0.144	-0.117	0.097	0.131	0.131	-0.168	0.063	1	<5.0E-05	<5.0E-05	<5.0E-05
	Height	Frontal nasal height	FNH	0.408	0.126	0.426	0.296	0.224	0.839	0.894	0.276	0.026	-0.244	-0.324	-0.357	-0.327	-0.233	-0.201	-0.244	-0.242	0.195	0.146	0.07	0.106	-0.064	-0.0215527	0.077	0.166	-0.00140907	0.039	0.128	0.371	0.151	0.175	0.249	0.256	-0.0125006	-0.00107593	0.073	0.108	-0.0232846	-0.073	0.139	-0.00171922	0.08	0.303	1	<5.0E-05	<5.0E-05
		Profile nasal length	PNL	0.232	0.097	0.222	0.182	0.243	0.547	0.513	0.26	-0.0216843	-0.2	-0.242	-0.087	-0.088	-0.128	-0.114	-0.00202064	-0.0199359	0.218	0.143	0.087	-0.099	-0.195	0.034	-0.00316143	0.235	0.0116871	0.085	0.104	0.199	-0.0252107	0.0088311	0.11	0.129	-0.033	-0.00860738	-0.11	-0.092	0.048	0.072	0.043	-0.082	0.0202298	0.293	0.584	1	<5.0E-05
		Nasal bridge height	NBH	0.143	0.051	0.137	0.109	0.127	0.441	0.435	0.136	-0.0154824	-0.2	-0.219	-0.07	-0.064	-0.045	-0.0235154	-0.048	-0.065	0.211	0.162	0.086	-0.195	-0.05	-0.188	0.043	0.109	0.042	0.073	0.11	0.132	0.0081226	0.041	0.059	0.068	0.044	0.081	-0.05	-0.0268081	-0.00284963	-0.0159599	0.0105073	-0.0217841	0.0221657	0.208	0.525	0.821	1
		Nasal tip height	NTH	0.187	0.075	0.188	0.156	0.252	0.291	0.233	0.255	-0.0130371	-0.074	-0.119	-0.065	-0.061	-0.148	-0.145	0.046	0.045	0.084	0.0127262	0.042	0.158	-0.236	0.309	-0.08	0.205	-0.073	0.032	0.0205014	0.135	-0.054	-0.048	0.097	0.105	-0.1	-0.11	-0.104	-0.104	0.088	0.124	0.046	-0.114	0.000375412	0.157	0.215	0.358	-0.122
	Depth	Nasal bridge depth	NBD	0.22	0.193	0.206	0.221	0.157	0.257	0.278	0.236	-0.034	-0.066	-0.05	-0.034	-0.035	-0.162	-0.138	0.112	0.103	0.076	0.056	0.00949905	0.058	-0.279	0.338	-0.00265619	0.245	-0.125	0.0200232	-0.038	0.154	-0.046	-0.036	0.149	0.146	-0.193	-0.184	-0.132	-0.118	0.122	0.178	0.063	-0.135	0.039	0.313	0.24	0.446	0.158
		Nasal tip protrusion	NTP	0.227	0.14	0.235	0.209	0.116	0.357	0.402	0.181	-0.029	-0.115	-0.121	-0.068	-0.063	-0.0262742	-0.0012562	-0.045	-0.067	0.198	0.159	0.057	-0.111	-0.055	-0.127	0.109	0.058	0.0225361	0.031	0.051	0.205	0.102	0.133	0.153	0.142	0.036	0.055	-0.0111578	0.0155154	-0.00150208	-0.048	0.07	0.0121612	0.072	0.219	0.413	0.434	0.485
	Area	Profile nasal area	PNAR	0.307	0.192	0.298	0.277	0.247	0.526	0.535	0.314	-0.038	-0.173	-0.194	-0.084	-0.078	-0.124	-0.1	0.0105083	0.00232894	0.239	0.161	0.096	-0.066	-0.173	0.09	0.049	0.219	-0.0102222	0.063	0.055	0.251	0.029	0.056	0.185	0.187	-0.064	-0.04	-0.094	-0.082	0.06	0.076	0.082	-0.077	0.051	0.35	0.554	0.794	0.612
Nose (shape)	Angle	Nasal bridge angle	NBA	0.038	0.00869529	0.046	0.031	0.0149032	0.086	0.094	0.0152094	0.088	0.047	0.0251974	-0.029	-0.0240366	0.00439786	0.017202	-0.049	-0.049	0.052	0.089	0.057	-0.11	0.474	-0.317	0.045	-0.094	-0.095	-0.029	0.041	0.04	0.026	0.042	0.00828919	0.03	0.038	0.053	0.035	0.034	-0.04	-0.055	0.00274683	0.0206741	0.0189022	-0.0119787	0.108	0.04	0.313
		Nasolabial angle	NA	-0.084	-0.079	-0.087	-0.084	0.055	-0.114	-0.191	0.00465445	0.000114558	0.044	0.0226778	0.0241504	0.0238439	-0.061	-0.072	0.063	0.083	-0.12	-0.113	-0.041	0.194	-0.154	0.301	-0.113	0.075	-0.055	-0.00117367	-0.0263953	-0.098	-0.116	-0.133	-0.074	-0.069	-0.08	-0.1	-0.054	-0.083	0.052	0.108	-0.035	-0.073	-0.063	-0.094	-0.204	-0.14	-0.472
		Profile nasal angle	PNA	0.075	0.058	0.084	0.078	0.051	0.071	0.076	0.073	0.12	0.092	0.071	-0.0194863	-0.031	-0.028	-0.038	-0.000192167	-0.00682588	0.062	0.083	0.063	0.0219199	0.479	-0.0120264	-0.00085616	-0.0112933	-0.162	-0.044	0.0130801	0.068	0.0235199	0.031	0.057	0.061	-0.0228377	-0.029	-0.0054146	0.00440654	0.010352	0.00714579	0.029	-0.0133885	0.04	0.049	0.064	-0.00885361	0.0125326
Mouth (size)	Height	Right upper lip thickness	RULT	0.0238111	0.052	0.044	0.052	0.149	0.0178754	-0.0159266	0.118	0.286	0.296	0.292	-0.041	-0.044	0.00612437	0.0216803	-0.077	-0.09	-0.116	-0.071	-0.035	-0.066	0.14	-0.036	0.0232568	-0.133	-0.027	-0.1	0.0169827	0.086	0.078	0.1	0.05	0.053	0.0155678	0.037	0.097	0.101	-0.028	-0.106	0.055	0.039	0.105	-0.09	-0.069	-0.111	-0.067
		Left upper lip thickness	LULT	0.00338515	0.034	0.0206251	0.032	0.173	0.0205939	-0.036	0.13	0.3	0.281	0.28	-0.043	-0.043	0.031	0.0140131	-0.089	-0.08	-0.127	-0.068	-0.05	-0.074	0.113	-0.045	0.039	-0.141	-0.0239372	-0.097	0.00935917	0.072	0.085	0.079	0.045	0.041	0.048	0.029	0.093	0.115	-0.047	-0.094	0.063	0.058	0.086	-0.105	-0.083	-0.139	-0.102
Upper eyelid (size)	Width	Right eyelid peak width	RELPW	0.155	0.102	0.185	0.13	0.032	0.146	0.203	0.079	0.00653583	0.00406371	-0.0104429	-0.233	-0.187	-0.041	-0.046	-0.182	-0.118	0.043	0.066	-0.000520597	-0.0231864	0.0108126	-0.0224779	0.067	0.0133248	-0.014093	-0.0161902	0.0159431	0.143	0.262	0.22	0.11	0.129	-0.000329041	-0.0173655	0.17	0.104	-0.039	-0.068	-0.0115861	0.189	0.077	0.062	0.186	0.066	0.073
		Left eyelid peak width	LELPW	0.14	0.091	0.163	0.12	0.029	0.156	0.202	0.08	0.028	0.00312183	-0.0185325	-0.207	-0.229	-0.048	-0.039	-0.165	-0.165	0.027	0.033	0.00877597	0.00522153	0.0141156	-0.00100005	0.04	0.0103821	-0.0241236	-0.0196206	0.031	0.144	0.234	0.266	0.118	0.1	0.0148018	-0.00360808	0.144	0.14	-0.065	-0.105	0.0214067	0.156	0.08	0.063	0.182	0.065	0.061
		Right eyelid width	RELW	0.235	0.194	0.229	0.237	0.107	0.18	0.238	0.186	0.0101603	0.035	0.0229991	0.061	0.0209728	-0.058	-0.079	0.128	0.08	0.117	0.08	0.043	-0.0142311	-0.00698847	0.0149624	0.039	0.072	-0.00658298	-0.0126593	0.0118646	0.342	-0.074	-0.041	0.323	0.255	-0.04	-0.0158992	-0.122	-0.113	0.098	0.081	0.283	-0.273	0.144	0.166	0.173	0.145	0.098
		Left eyelid width	LELW	0.247	0.2	0.24	0.243	0.119	0.198	0.252	0.199	0.0217288	0.043	0.033	0.020262	0.055	-0.078	-0.068	0.084	0.12	0.09	0.058	0.036	-0.045	0.0224995	-0.0181306	0.068	0.037	0.00379047	-0.036	0.0113412	0.332	-0.069	-0.072	0.248	0.294	-0.029	-0.038	-0.104	-0.112	0.063	0.097	0.214	-0.223	0.141	0.175	0.188	0.128	0.088
Upper eyelid (shape)	Angle	Tangent line angle of er1	TLAER1	0.03	0.08	0.0151992	0.057	0.00660957	-0.057	-0.047	0.035	-0.0233063	0.0223403	0.049	0.158	0.142	0.044	0.00319189	0.25	0.25	0.033	0.0122797	0.0176667	0.077	-0.041	0.088	-0.02777	0.076	0.00060522	0.0116662	-0.05	0.00684813	-0.112	-0.127	0.029	0.0133414	-0.0214095	-0.051	-0.259	-0.262	0.129	0.218	-0.075	-0.13	0.000190978	0.078	-0.077	0.037	0.0164626
		Tangent line angle of er2	TLAER2	0.122	0.191	0.075	0.172	0.064	-0.06	-0.04	0.146	-0.045	0.056	0.097	0.276	0.233	-0.126	-0.125	0.537	0.445	0.036	-0.00808489	0.029	0.123	-0.056	0.101	-0.0159474	0.091	0.019845	-0.00200282	-0.106	0.133	-0.373	-0.318	0.177	0.118	-0.274	-0.234	-0.519	-0.435	0.316	0.434	0.062	-0.478	0.039	0.123	-0.132	0.035	-0.0220715
		Tangent line angle of er3	TLAER3	0.00955537	0.043	-0.0246341	0.035	0.033	-0.049	-0.065	0.047	-0.00987053	0.029	0.039	0.241	0.187	-0.059	-0.052	0.3	0.208	0.016724	-0.0240332	0.0255789	0.031	-0.0171831	0.034	-0.034	0.033	0.0167515	0.00429824	-0.035	0.079	-0.321	-0.251	0.1	0.048	-0.11	-0.071	-0.279	-0.197	0.135	0.176	0.156	-0.379	0.029	0.032	-0.1	0.0100827	-0.029
		Tangent line angle of er4	TLAER4	-0.124	-0.099	-0.146	-0.108	-0.00980693	-0.065	-0.116	-0.062	0.0164411	-0.0086467	-0.0136665	0.308	0.232	0.193	0.139	0.119	0.075	0.034	-0.00591524	0.0249407	-0.036	-0.0174981	0.0140167	-0.061	0.029	-0.00706857	0.039	0.031	-0.03	-0.2	-0.175	-0.0162824	-0.058	0.23	0.21	-0.124	-0.1	-0.033	-0.037	0.142	-0.189	-0.00969557	-0.00954758	-0.084	0.029	0.0196116
		Tangent line angle of er5	TLAER5	-0.184	-0.16	-0.192	-0.178	-0.029	-0.056	-0.126	-0.116	0.0192046	-0.042	-0.046	0.283	0.208	0.406	0.3	-0.078	-0.052	0.0179801	0.000524865	0.00868858	-0.071	-0.00290614	-0.00971441	-0.049	0.00111169	-0.00868594	0.043	0.075	-0.116	0.03	-0.00393484	-0.119	-0.133	0.509	0.413	0.051	0.00160337	-0.181	-0.214	0.053	0.101	-0.043	-0.046	-0.051	0.035	0.068
		Tangent line angle of er6	TLAER6	-0.104	-0.091	-0.102	-0.106	0.00444076	0.03	-0.0221959	-0.049	-0.0116073	-0.083	-0.069	0.055	0.0228767	0.403	0.317	-0.319	-0.231	-0.057	-0.0259316	-0.0171687	-0.082	0.06	-0.102	0.031	-0.102	0.0161422	-0.0162607	0.073	-0.099	0.352	0.299	-0.134	-0.089	0.528	0.394	0.294	0.209	-0.292	-0.352	-0.0244974	0.431	-0.029	-0.095	0.042	-0.00959101	0.071
		Tangent line angle of er7	TLAER7	0.056	0.057	0.058	0.056	0.035	0.07	0.078	0.061	-0.0226357	-0.029	-0.0164304	-0.139	-0.117	0.00869496	0.039	-0.186	-0.154	-0.074	-0.037	-0.0175914	-0.0179503	0.063	-0.092	0.063	-0.1	0.0265019	-0.051	-1.77423e-05	0.029	0.231	0.236	0.00540913	0.044	0.028	0.00881944	0.197	0.184	-0.083	-0.139	-0.00635578	0.225	0.0194853	-0.052	0.068	-0.042	-0.000524699
		Tangent line angle of el1	TLAEL1	0.044	0.079	0.038	0.064	-0.0108119	-0.053	-0.0242632	0.0252937	-0.028	0.016071	0.037	0.127	0.145	0.045	0.048	0.209	0.254	0.065	0.042	0.0257933	0.066	-0.061	0.046	-0.017599	0.094	-0.00978335	0.038	-0.059	0.00173105	-0.087	-0.086	0.0247907	0.0212685	-0.00150206	-0.0224665	-0.221	-0.264	0.089	0.208	-0.086	-0.097	-0.0066553	0.059	-0.067	0.031	0.0213765
		Tangent line angle of el2	TLAEL2	0.116	0.175	0.079	0.152	0.048	-0.066	-0.033	0.12	-0.038	0.064	0.104	0.196	0.252	-0.135	-0.147	0.43	0.506	0.049	0.00836631	0.0241611	0.078	-0.047	0.054	0.00145813	0.085	0.0176787	-0.00574815	-0.115	0.115	-0.303	-0.353	0.138	0.145	-0.241	-0.284	-0.417	-0.481	0.255	0.505	0.0260922	-0.38	0.028	0.102	-0.119	0.00973768	-0.037
		Tangent line angle of el3	TLAEL3	0.0233208	0.045	-0.00688984	0.04	0.046	-0.033	-0.042	0.052	-0.0145222	0.031	0.046	0.171	0.23	-0.068	-0.066	0.227	0.258	0.0116438	-0.0113799	0.010858	-0.0101653	-0.00536173	0.00425299	0.00299973	0.0145016	0.0217365	-0.013341	-0.049	0.069	-0.261	-0.3	0.058	0.099	-0.107	-0.101	-0.212	-0.227	0.114	0.23	0.104	-0.298	0.0171483	0.044	-0.073	0.0025968	-0.027
		Tangent line angle of el4	TLAEL4	-0.074	-0.064	-0.096	-0.065	0.0236237	-0.027	-0.071	-0.027	0.000916923	0.000174448	-0.00318684	0.236	0.286	0.141	0.168	0.105	0.109	0.036	0.0225722	0.00568713	-0.075	-0.00592055	-0.037	0.00212763	0.00710576	0.0123547	0.0213682	0.0175411	-0.0258231	-0.188	-0.198	-0.049	-0.00830883	0.161	0.229	-0.11	-0.113	-0.00778473	-0.027	0.069	-0.16	-0.016901	0.0116424	-0.052	0.031	0.035
		Tangent line angle of el5	TLAEL5	-0.112	-0.11	-0.114	-0.109	-0.00315534	-0.0138766	-0.062	-0.072	-0.000464258	-0.037	-0.049	0.228	0.248	0.321	0.369	-0.034	-0.056	0.051	0.049	0.00403586	-0.096	-0.00388644	-0.073	0.00570266	-0.000613744	0.0127961	0.053	0.057	-0.09	-0.000530164	0.0250016	-0.106	-0.101	0.389	0.484	0.0114515	0.0152035	-0.127	-0.267	-0.00250613	0.064	-0.043	-0.0228487	-0.0122774	0.05	0.091
		Tangent line angle of el6	TLAEL6	-0.063	-0.073	-0.05	-0.069	0.00963918	0.067	0.031	-0.031	-0.000178718	-0.062	-0.071	0.0191735	-0.00488107	0.323	0.368	-0.256	-0.308	-0.00317211	0.0150251	-0.00288691	-0.104	0.064	-0.151	0.038	-0.084	0.0210116	0.00936161	0.077	-0.055	0.326	0.38	-0.072	-0.084	0.419	0.49	0.241	0.268	-0.241	-0.455	-0.0258045	0.368	0.0060401	-0.085	0.084	0.013914	0.098
		Tangent line angle of el7	TLAEL7	0.044	0.039	0.046	0.042	0.027	0.068	0.072	0.051	0.0053962	-0.01912	-0.012287	-0.135	-0.167	-0.0020077	-0.00403046	-0.169	-0.201	-0.06	-0.037	-0.0104939	-0.02569	0.077	-0.081	0.038	-0.091	0.0217634	-0.043	0.0224021	0.053	0.234	0.249	0.042	0.039	0.0174601	0.00688052	0.185	0.211	-0.08	-0.16	0.029	0.207	0.042	-0.05	0.074	-0.041	-0.00677207
	Ratio	Right eyelid peak position ratio	RELPPR	0.0204056	-0.00568131	0.054	-0.00296527	-0.028	0.044	0.068	-0.027	0.000640791	-0.01576	-0.0227209	-0.257	-0.189	-0.00679076	0.00739058	-0.247	-0.16	-0.0253928	0.0148822	-0.0241453	-0.0146781	0.0191954	-0.03	0.043	-0.03	-0.00759722	-0.0129526	0.0134804	-0.056	0.29	0.23	-0.072	-0.0233169	0.0242842	-0.00302347	0.232	0.163	-0.086	-0.116	-0.161	0.33	-0.0102095	-0.0262441	0.088	-0.0168468	0.0186011
		Left eyelid peak position ratio	LELPPR	0.00271622	-0.0148427	0.033	-0.0122559	-0.04	0.034	0.052	-0.029	0.0155026	-0.0156103	-0.028	-0.191	-0.243	0.0181096	0.0111696	-0.2	-0.225	-0.0232015	-0.00010816	-0.0124385	0.031	-0.000564449	0.0135165	0.000795772	-0.0108217	-0.0185314	0.00609888	0.0229583	-0.045	0.258	0.29	-0.0237877	-0.072	0.049	0.0207131	0.191	0.202	-0.087	-0.164	-0.093	0.269	-0.00445281	-0.031	0.068	-0.004426	0.0113662
		Right eyelid slant	RELS	-0.053	0.0260329	-0.098	-0.00741867	0.049	-0.05	-0.108	0.041	-0.033	-0.027	0.0145186	0.445	0.336	0.354	0.259	0.224	0.196	0.000282013	-0.032	0.0163809	0.00793393	-0.00633981	0.0106528	-0.0187403	0.000970807	0.0258372	0.00432406	-0.00462918	0.00189529	-0.097	-0.088	0.0106988	-0.016911	0.371	0.274	-0.226	-0.216	-0.024508	0.0197528	0.101	-0.104	-0.00490746	0.013455	-0.111	0.042	0.061
		Left eyelid slant	LELS	0.00028163	0.046	-0.03	0.036	0.069	-0.012589	-0.044	0.063	-0.041	-0.00933887	0.0148533	0.315	0.361	0.259	0.301	0.187	0.201	0.055	0.03	0.0256868	-0.058	0.0176709	-0.108	0.0216654	0.00282422	0.043	0.024405	-0.032	0.0237484	-0.068	-0.06	0.0195126	0.04	0.266	0.33	-0.195	-0.214	-0.00219067	-0.0146815	0.03	-0.075	0.00752753	0.0159775	-0.059	0.034	0.07
		Right eyelid medial slant	RELMS	0.12	0.17	0.093	0.153	0.034	-0.045	-0.00764929	0.109	-0.047	0.039	0.08	0.146	0.137	-0.069	-0.083	0.374	0.349	0.028	0.0107421	0.00917111	0.108	-0.053	0.094	0.00578806	0.083	0.00984147	-0.0101077	-0.096	0.073	-0.175	-0.175	0.106	0.085	-0.179	-0.189	-0.376	-0.344	0.25	0.346	-0.066	-0.241	0.0222768	0.105	-0.079	0.028	0.00167984
		Left eyelid medial slant	LELMS	0.108	0.149	0.094	0.132	0.00987212	-0.043	0.0014949	0.081	-0.036	0.04	0.07	0.095	0.119	-0.068	-0.072	0.288	0.346	0.05	0.0177349	0.0208506	0.095	-0.05	0.057	-0.0053193	0.085	0.00195262	0.00326799	-0.096	0.065	-0.128	-0.15	0.101	0.082	-0.146	-0.19	-0.286	-0.344	0.169	0.352	-0.056	-0.185	0.0102447	0.079	-0.066	0.0191401	-0.00838869
		Right eyelid lateral slant	RELLS	-0.147	-0.139	-0.143	-0.155	0.00928739	0.0203406	-0.054	-0.073	-0.00526955	-0.084	-0.082	0.091	0.054	0.441	0.356	-0.329	-0.247	-0.051	-0.0171419	-0.0108844	-0.095	0.046	-0.101	0.0178829	-0.093	0.0124946	0.00860733	0.085	-0.125	0.338	0.294	-0.16	-0.117	0.587	0.46	0.3	0.217	-0.317	-0.393	-0.0144296	0.433	-0.043	-0.109	0.0243303	-0.00943556	0.069
		Left eyelid lateral slant	LELLS	-0.104	-0.115	-0.091	-0.111	0.0142315	0.063	0.00358507	-0.049	0.000184402	-0.076	-0.089	0.045	0.03	0.349	0.404	-0.268	-0.331	-0.0109174	0.0115395	-0.0144031	-0.128	0.069	-0.16	0.043	-0.094	0.028	0.0112002	0.082	-0.084	0.309	0.37	-0.092	-0.11	0.459	0.557	0.25	0.279	-0.26	-0.499	-0.0125591	0.361	-0.0109666	-0.091	0.073	0.0115738	0.099
	Curvature	Right eyelid average curvature	RELAC	-0.247	-0.269	-0.232	-0.276	-0.072	-0.052	-0.134	-0.192	0.0152572	-0.07	-0.097	-0.05	-0.042	0.21	0.188	-0.332	-0.28	-0.04	-0.00861731	-0.019392	-0.087	0.00511864	-0.059	-0.0272345	-0.057	-0.0176288	0.044	0.089	-0.233	0.177	0.139	-0.255	-0.212	0.335	0.289	0.299	0.259	-0.275	-0.326	-0.08	0.338	-0.101	-0.158	-0.0244648	-0.058	-0.0190269
		Right eyelid maximal curvature	RELMC	-0.131	-0.149	-0.131	-0.145	-0.038	-0.034	-0.078	-0.102	0.00430373	-0.027	-0.048	-0.0246104	-0.0150829	0.04	0.039	-0.14	-0.129	-0.0146396	-0.00478852	-0.0105923	-0.054	0.0030875	-0.034	-0.0204033	-0.0229998	0.00018235	0.0225541	0.065	-0.103	0.0125846	0.0112261	-0.119	-0.105	0.101	0.094	0.132	0.131	-0.135	-0.13	0.00637722	0.093	-0.058	-0.085	-0.023004	-0.033	-0.033
		Left eyelid average curvature	LELAC	-0.153	-0.169	-0.159	-0.17	-0.03	-0.0201679	-0.09	-0.118	0.00765904	-0.064	-0.079	-0.0153049	-0.0145434	0.095	0.123	-0.161	-0.205	-0.035	-0.0163399	-0.0100662	-0.039	-0.00511374	-0.0180911	-0.0257391	-0.029	-0.00802883	0.0113378	0.039	-0.137	0.062	0.114	-0.146	-0.13	0.142	0.228	0.147	0.175	-0.178	-0.233	-0.061	0.154	-0.073	-0.082	-0.00605931	-0.0242721	0.000672237
		Left eyelid maximal curvature	LELMC	-0.138	-0.145	-0.145	-0.149	-0.0189205	-0.045	-0.099	-0.103	-0.00177552	-0.056	-0.058	-0.00979767	-0.000340542	0.046	0.064	-0.105	-0.132	-0.027	-0.009455	-0.013761	-0.052	0.00826402	-0.0153514	-0.0209277	-0.044	-0.022157	0.00171819	0.045	-0.121	-0.00640853	0.0210425	-0.13	-0.111	0.069	0.13	0.096	0.122	-0.096	-0.167	-0.028	0.076	-0.067	-0.067	-0.047	-0.045	-0.0209389
[truncated: 39 more columns]
